# Supplementary material for: Alterations in the chondrocyte surfaceome in response to pro-inflammatory cytokines
Source: PubMed Central journal article supplement (PMC7318434; doi:10.1186/s12860-020-00288-9), 2020-06-26
Supplement: 12860_2020_288_MOESM1_ESM.pdf [file 12860_2020_288_MOESM1_ESM.pdf]

## Supplementary Materials for

# Alterations in the chondrocyte surfaceome in response to pro-inflammatory cytokines

Bernadette Jeremiase, Csaba Matta\*, Christopher R. Fellows, David J. Boocock, Julia R. Smith, Susan Liddell, Floris Lafeber, Willem E. van Spil, Ali Mobasher

\*Corresponding author. E-mail: [matta.csaba@med.unideb.hu](mailto:matta.csaba@med.unideb.hu) (C.M.)

### This PDF file (Additional File #1) includes:

- Figure S1.** GAG release levels in the chondrocyte secretome upon cytokine exposure
- Figure S2.** Rate of apoptosis of chondrocytes under pro-inflammatory versus control conditions
- Table S1.** List of proteins classified as Enzymes based on GO annotations
- Table S2.** List of proteins classified as Receptors based on GO annotations
- Table S3.** List of proteins classified as Transporters based on GO annotations
- Table S4.** List of proteins that could not be classified into any of the previous categories based on GO annotations (listed as Unclassified)
- Table S5.** List of proteins classified into the category of Structural/Adhesion/Junctional proteins based on GO annotations
- Table S6.** List of proteins classified into the category of Extracellular matrix proteins based on GO annotations

## 1. GAG release levels in the chondrocyte secretome upon cytokine exposure

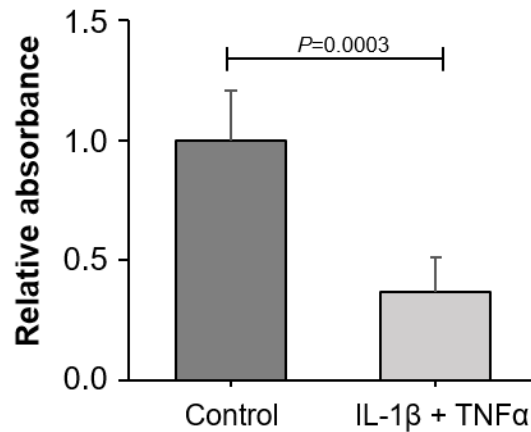

**Figure S1.** GAG release levels in the chondrocyte secretome upon cytokine exposure (IL-1 $\beta$ +TNF- $\alpha$ , both 10 ng/mL) versus control conditions. GAG release as measured by DMMB assay shows a significant reduction of GAG in the chondrocyte secretome upon cytokine exposure as compared to control. Measurements from four horses (four biological replicates) were combined to provide final values for each group (mean  $\pm$  SD).

## 2. Apoptotic rate in primary chondrocytes exposed to pro-inflammatory cytokines

Primary equine articular chondrocytes in the experimental group were treated with the pro-inflammatory cytokines IL-1 $\beta$  and TNF- $\alpha$  (both at 10 ng/mL) (equine recombinant, R&D Systems, Minneapolis, MN, USA) for 7 days. Rate of apoptosis was measured using the luminescence based Promega Caspase-Glo 3/7 Assay System, by determining caspase 3 and 7 activation, according to the instructions of the manufacturer. Luminescence was detected using a Tecan SPARK 10M Plate Reader (Tecan, Männedorf, Switzerland).

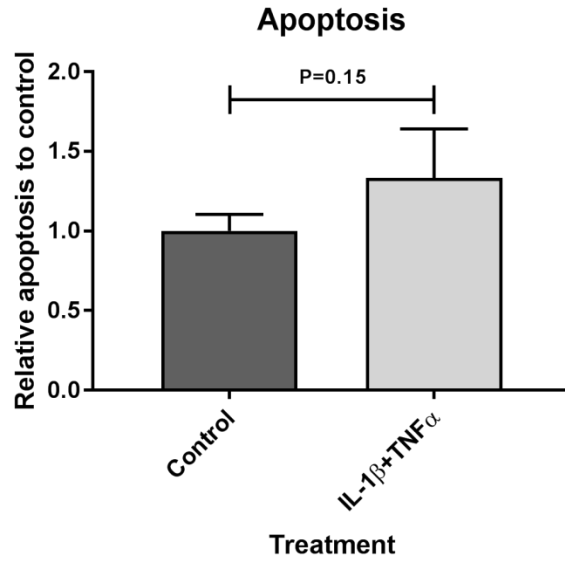

**Figure S2.** Rate of apoptosis of chondrocytes under inflammatory (IL-1 $\beta$ +TNF- $\alpha$ , both 10 ng/mL) versus control conditions. Apoptotic rate was unchanged under inflammatory conditions (P=0.15).

**Table S1.** List of proteins classified as *Enzymes* based on GO annotations

| Accession | Entry name  | Description                                                                                                                                    | Sample   |
|-----------|-------------|------------------------------------------------------------------------------------------------------------------------------------------------|----------|
| Q05927    | 5NTD_BOVIN  | 5'-nucleotidase (5'-NT) (EC 3.1.3.5) (Ecto-5'-nucleotidase) (CD antigen CD73)                                                                  | Both     |
| P08907    | AATM_HORSE  | Aspartate aminotransferase, mitochondrial (mAspAT) (EC 2.6.1.1) (EC 2.6.1.7) (Fatty acid-binding protein) (FABP-1)                             | Control  |
| Q10741    | ADA10_BOVIN | Disintegrin and metalloproteinase domain-containing protein 10 (ADAM 10) (EC 3.4.24.81) (CD antigen CD156c)                                    | Both     |
| P04075    | ALDOA_HUMAN | Fructose-bisphosphate aldolase A (EC 4.1.2.13) (Lung cancer antigen NY-LU-1) (Muscle-type aldolase)                                            | Cytokine |
| P09972    | ALDOC_HUMAN | Fructose-bisphosphate aldolase C (EC 4.1.2.13) (Brain-type aldolase)                                                                           | Control  |
| P84085    | ARF5_HUMAN  | ADP-ribosylation factor 5                                                                                                                      | Control  |
| P62330    | ARF6_HUMAN  | ADP-ribosylation factor 6                                                                                                                      | Control  |
| P05089    | ARG1_HUMAN  | Arginase-1 (EC 3.5.3.1) (Liver-type arginase) (Type I arginase)                                                                                | Control  |
| P58242    | ASM3B_MOUSE | Acid sphingomyelinase-like phosphodiesterase 3b (ASM-like phosphodiesterase 3b) (EC 3.1.4.-)                                                   | Cytokine |
| Q28056    | ASPH_BOVIN  | Aspartyl/asparaginyl beta-hydroxylase (EC 1.14.11.16) (Aspartate beta-hydroxylase) (ASP beta-hydroxylase) (Peptide-aspartate beta-dioxygenase) | Control  |
| P23634    | AT2B4_HUMAN | Plasma membrane calcium-transporting ATPase 4 (PMCA4) (EC 7.2.2.10) (Matrix-remodeling-associated protein 1)                                   | Cytokine |
| Q8TF62    | AT8B4_HUMAN | Probable phospholipid-transporting ATPase IM (EC 7.6.2.1) (ATPase class I type 8B member 4) (P4-ATPase flippase complex alpha subunit ATP8B4)  | Control  |
| P19483    | ATPA_BOVIN  | ATP synthase subunit alpha, mitochondrial (ATP synthase F1 subunit alpha)                                                                      | Control  |
| P11021    | BIP_HUMAN   | Endoplasmic reticulum chaperone BiP (EC 3.6.4.10) (78 kDa glucose-regulated protein) (GRP-78) (Binding-immunoglobulin protein)                 | Both     |
| P48754    | BRCA1_MOUSE | Breast cancer type 1 susceptibility protein homolog (EC 2.3.2.27) (RING-type E3 ubiquitin transferase BRCA1)                                   | Cytokine |
| P11586    | C1TC_HUMAN  | C-1-tetrahydrofolate synthase, cytoplasmic (C1-THF synthase)                                                                                   | Control  |
| P07384    | CAN1_HUMAN  | Calpain-1 catalytic subunit (EC 3.4.22.52) (Calcium-activated neutral proteinase 1) (CANP 1) (Cell proliferation-inducing gene 30 protein)     | Control  |
| P17655    | CAN2_HUMAN  | Calpain-2 catalytic subunit (EC 3.4.22.53) (Calcium-activated neutral proteinase 2) (CANP 2)                                                   | Control  |
| P80209    | CATD_BOVIN  | Cathepsin D (EC 3.4.23.5)                                                                                                                      | Control  |
| P14384    | CBPM_HUMAN  | Carboxypeptidase M (CPM) (EC 3.4.17.12)                                                                                                        | Both     |
| Q2KJ93    | CDC42_BOVIN | Cell division control protein 42 homolog                                                                                                       | Control  |
| Q9UHN6    | CEIP2_HUMAN | Cell surface hyaluronidase (EC 3.2.1.35) (Cell migration-inducing hyaluronidase 2) (Transmembrane protein 2)                                   | Cytokine |
| Q8WUJ3    | CEMIP_HUMAN | Cell migration-inducing and hyaluronan-binding protein (EC 3.2.1.35)                                                                           | Control  |
| P00450    | CERU_HUMAN  | Ceruloplasmin (EC 1.16.3.1) (Ferroxidase)                                                                                                      | Both     |
| P06623    | CN37_BOVIN  | 2',3'-cyclic-nucleotide 3'-phosphodiesterase (CNP) (CNPase) (EC 3.1.4.37)                                                                      | Control  |
| P06813    | CPNS1_RABIT | Calpain small subunit 1 (CSS1) (Calcium-activated neutral proteinase small subunit) (CANP small subunit)                                       | Control  |
| P81605    | DCD_HUMAN   | Dermcidin (EC 3.4.-.-) (Preproteolysin)                                                                                                        | Both     |
| O75912    | DGKI_HUMAN  | Diacylglycerol kinase iota (DAG kinase iota) (EC 2.7.1.107) (Diglyceride kinase iota) (DGK-iota)                                               | Control  |
| P42891    | ECE1_BOVIN  | Endothelin-converting enzyme 1 (ECE-1) (EC 3.4.24.71)                                                                                          | Both     |
| A2Q0Z0    | EF1A1_HORSE | Elongation factor 1-alpha 1 (EF-1-alpha-1) (Elongation factor Tu) (EF-Tu) (Eukaryotic elongation factor 1 A-1) (eEF1A-1)                       | Both     |
| Q5VTE0    | EF1A3_HUMAN | Putative elongation factor 1-alpha-like 3 (EF-1-alpha-like 3) (Eukaryotic elongation factor 1 A-like 3) (eEF1A-like 3)                         | Both     |
| P13639    | EF2_HUMAN   | Elongation factor 2 (EF-2)                                                                                                                     | Both     |
| Q9NZN4    | EHD2_HUMAN  | EH domain-containing protein 2 (PAST homolog 2)                                                                                                | Control  |
| O94919    | ENDD1_HUMAN | Endonuclease domain-containing 1 protein (EC 3.1.30.-)                                                                                         | Both     |
| Q9XSJ4    | ENOA_BOVIN  | Alpha-enolase (EC 4.2.1.11) (2-phospho-D-glycerate hydro-lyase) (Enolase 1) (HAP47) (Non-neural enolase) (NNE) (Phosphopyruvate hydratase)     | Both     |

**Table S1.** (continued)

| Accession | Entry name  | Description                                                                                                                                                   | Sample   |
|-----------|-------------|---------------------------------------------------------------------------------------------------------------------------------------------------------------|----------|
| Q04609    | FOLH1_HUMAN | Glutamate carboxypeptidase 2 (EC 3.4.17.21) (Cell growth-inhibiting gene 27 protein) (Folate hydrolase 1) (Folylpoly-gamma-glutamate carboxypeptidase) (FGCP) | Control  |
| Q6PB93    | GALT2_MOUSE | Polypeptide N-acetylgalactosaminyltransferase 2 (EC 2.4.1.41) (Polypeptide GalNAc transferase 2)                                                              | Cytokine |
| Q4R592    | GNAI2_MACFA | Guanine nucleotide-binding protein G(i) subunit alpha-2 (Adenylate cyclase-inhibiting G alpha protein)                                                        | Both     |
| P38646    | GRP75_HUMAN | Stress-70 protein, mitochondrial (75 kDa glucose-regulated protein)                                                                                           | Both     |
| Q8TCT9    | HM13_HUMAN  | Minor histocompatibility antigen H13 (EC 3.4.23.-) (Signal peptide peptidase)                                                                                 | Both     |
| Q9GKX7    | HS90A_HORSE | Heat shock protein HSP 90-alpha                                                                                                                               | Control  |
| P17066    | HSP76_HUMAN | Heat shock 70 kDa protein 6 (Heat shock 70 kDa protein B')                                                                                                    | Control  |
| A2Q0Z1    | HSP7C_HORSE | Heat shock cognate 71 kDa protein (Heat shock 70 kDa protein 8)                                                                                               | Both     |
| P60842    | IF4A1_HUMAN | Eukaryotic initiation factor 4A-I (eIF-4A-I) (eIF4A-I) (EC 3.6.4.13) (ATP-dependent RNA helicase eIF4A-1)                                                     | Both     |
| P14618    | KPYM_HUMAN  | Pyruvate kinase PKM (EC 2.7.1.40) (Cytosolic thyroid hormone-binding protein) (CTHBP)                                                                         | Both     |
| Q9UIQ6    | LCAP_HUMAN  | Leucyl-cystinyl aminopeptidase (Cystinyl aminopeptidase) (EC 3.4.11.3) (Insulin-regulated membrane aminopeptidase)                                            | Both     |
| Q8WWY8    | LIPH_HUMAN  | Lipase member H (LIPH) (EC 3.1.1.-) (LPD lipase-related protein) (Membrane-associated phosphatidic acid-selective phospholipase A1-alpha)                     | Control  |
| P17897    | LYZ1_MOUSE  | Lysozyme C-1 (EC 3.2.1.17) (1,4-beta-N-acetylmuramidase C) (Lysozyme C type P)                                                                                | Cytokine |
| P08905    | LYZ2_MOUSE  | Lysozyme C-2 (EC 3.2.1.17) (1,4-beta-N-acetylmuramidase C) (Lysozyme C type M)                                                                                | Cytokine |
| Q9GLE4    | MMP14_BOVIN | Matrix metalloproteinase-14 (MMP-14) (EC 3.4.24.80) (Membrane-type matrix metalloproteinase 1) (MT-MMP 1)                                                     | Both     |
| O15439    | MRP4_HUMAN  | Multidrug resistance-associated protein 4 (ATP-binding cassette sub-family C member 4) (MRP/cMOAT-related ABC transporter)                                    | Both     |
| P08473    | NEP_HUMAN   | Neprilysin (EC 3.4.24.11) (Atriopeptidase) (Common acute lymphocytic leukemia antigen) (Neutral endopeptidase 24.11) (CD antigen CD10)                        | Both     |
| Q28389    | PAG_HORSE   | Pregnancy-associated glycoprotein (PAG) (EC 3.4.23.-)                                                                                                         | Control  |
| P05307    | PDIA1_BOVIN | Protein disulfide-isomerase (PDI) (EC 5.3.4.1) (Cellular thyroid hormone-binding protein) (Prolyl 4-hydroxylase subunit beta) (p55)                           | Both     |
| P38657    | PDIA3_BOVIN | Protein disulfide-isomerase A3 (EC 5.3.4.1) (58 kDa glucose-regulated protein)                                                                                | Both     |
| Q29RV1    | PDIA4_BOVIN | Protein disulfide-isomerase A4 (EC 5.3.4.1)                                                                                                                   | Cytokine |
| Q15084    | PDIA6_HUMAN | Protein disulfide-isomerase A6 (EC 5.3.4.1) (Endoplasmic reticulum protein 5)                                                                                 | Cytokine |
| P00791    | PEPA_PIG    | Pepsin A (EC 3.4.23.1)                                                                                                                                        | Cytokine |
| P12273    | PIP_HUMAN   | Prolactin-inducible protein (Gross cystic disease fluid protein 15) (GCDFP-15) (Prolactin-induced protein) (Secretory actin-binding protein)                  | Both     |
| Q02809    | PLOD1_HUMAN | Procollagen-lysine,2-oxoglutarate 5-dioxygenase 1 (EC 1.14.11.4) (Lysyl hydroxylase 1) (LH1)                                                                  | Both     |
| O00469    | PLOD2_HUMAN | Procollagen-lysine,2-oxoglutarate 5-dioxygenase 2 (EC 1.14.11.4) (Lysyl hydroxylase 2) (LH2)                                                                  | Both     |
| O14495    | PLPP3_HUMAN | Phospholipid phosphatase 3 (EC 3.1.3.4) (Lipid phosphate phosphohydrolase 3) (PAP2-beta) (Phosphatidate phosphohydrolase type 2b)                             | Both     |
| Q06830    | PRDX1_HUMAN | Peroxiredoxin-1 (EC 1.11.1.15) (Natural killer cell-enhancing factor A) (Proliferation-associated gene protein) (Thioredoxin peroxidase 2)                    | Cytokine |
| P55786    | PSA_HUMAN   | Puromycin-sensitive aminopeptidase (PSA) (EC 3.4.11.14) (Cytosol alanyl aminopeptidase) (AAP-S)                                                               | Cytokine |
| Q9CWJ9    | PUR9_MOUSE  | Bifunctional purine biosynthesis protein PURH                                                                                                                 | Cytokine |
| P61106    | RAB14_HUMAN | Ras-related protein Rab-14                                                                                                                                    | Both     |
| P62820    | RAB1A_HUMAN | Ras-related protein Rab-1A (YPT1-related protein)                                                                                                             | Both     |
| Q9H0U4    | RAB1B_HUMAN | Ras-related protein Rab-1B                                                                                                                                    | Both     |
| P51156    | RAB26_RAT   | Ras-related protein Rab-26                                                                                                                                    | Cytokine |
| Q9BZG1    | RAB34_HUMAN | Ras-related protein Rab-34 (Ras-related protein Rab-39) (Ras-related protein Rah)                                                                             | Both     |
| Q15286    | RAB35_HUMAN | Ras-related protein Rab-35 (GTP-binding protein RAY) (Ras-related protein Rab-1C)                                                                             | Cytokine |
| Q06AU3    | RAB3A_PIG   | Ras-related protein Rab-3A                                                                                                                                    | Cytokine |

**Table S1.** (continued)

| Accession | Entry name  | Description                                                                                                            | Sample   |
|-----------|-------------|------------------------------------------------------------------------------------------------------------------------|----------|
| Q5KTJ7    | RAB3B_MESAU | Ras-related protein Rab-3B                                                                                             | Cytokine |
| Q86YS6    | RAB43_HUMAN | Ras-related protein Rab-43 (Ras-related protein Rab-41)                                                                | Cytokine |
| Q8CB87    | RAB44_MOUSE | Ras-related protein Rab-44                                                                                             | Cytokine |
| P61017    | RAB4B_CANLF | Ras-related protein Rab-4B                                                                                             | Cytokine |
| P51148    | RAB5C_HUMAN | Ras-related protein Rab-5C (L1880) (RAB5L)                                                                             | Control  |
| P35279    | RAB6A_MOUSE | Ras-related protein Rab-6A (Rab-6)                                                                                     | Cytokine |
| P51149    | RAB7A_HUMAN | Ras-related protein Rab-7a                                                                                             | Control  |
| A4FV54    | RAB8A_BOVIN | Ras-related protein Rab-8A                                                                                             | Cytokine |
| Q2HJI8    | RAB8B_BOVIN | Ras-related protein Rab-8B                                                                                             | Cytokine |
| P62998    | RAC1_BOVIN  | Ras-related C3 botulinum toxin substrate 1 (p21-Rac1)                                                                  | Control  |
| P62833    | RAP1A_BOVIN | Ras-related protein Rap-1A (GTP-binding protein smg p21A)                                                              | Control  |
| P61223    | RAP1B_BOVIN | Ras-related protein Rap-1b (GTP-binding protein smg p21B)                                                              | Control  |
| Q99P58    | RB27B_MOUSE | Ras-related protein Rab-27B                                                                                            | Cytokine |
| Q9HB40    | RISC_HUMAN  | Retinoid-inducible serine carboxypeptidase (EC 3.4.16.-) (Serine carboxypeptidase 1)                                   | Control  |
| A6NIZ1    | RP1BL_HUMAN | Ras-related protein Rap-1b-like protein                                                                                | Control  |
| Q7KZF4    | SND1_HUMAN  | Staphylococcal nuclease domain-containing protein 1 (EC 3.1.31.1) (100 kDa coactivator)                                | Control  |
| Q658P3    | STEA3_HUMAN | Metalloreductase STEAP3 (EC 1.16.1.-) (Dudulin-2) (Six-transmembrane epithelial antigen of prostate 3)                 | Both     |
| P22735    | TGM1_HUMAN  | Protein-glutamine gamma-glutamyltransferase K (EC 2.3.2.13) (Transglutaminase K)                                       | Cytokine |
| O97508    | THIO_HORSE  | Thioredoxin (Trx)                                                                                                      | Both     |
| Q96JJ7    | TMX3_HUMAN  | Protein disulfide-isomerase TMX3 (EC 5.3.4.1) (Thioredoxin domain-containing protein 10)                               | Control  |
| P02788    | TRFL_HUMAN  | Lactotransferrin (Lactoferrin) (EC 3.4.21.-) (Growth-inhibiting protein 12) (Tlalactoferrin)                           | Control  |
| P36406    | TRI23_HUMAN | E3 ubiquitin-protein ligase TRIM23 (EC 2.3.2.27) (ADP-ribosylation factor domain-containing protein 1)                 | Control  |
| P00760    | TRY1_BOVIN  | Cationic trypsin (EC 3.4.21.4) (Beta-trypsin)                                                                          | Cytokine |
| Q8NBS9    | TXND5_HUMAN | Thioredoxin domain-containing protein 5 (Endoplasmic reticulum resident protein 46)                                    | Control  |
| Q5T4S7    | UBR4_HUMAN  | E3 ubiquitin-protein ligase UBR4 (EC 2.3.2.27) (600 kDa retinoblastoma protein-associated factor)                      | Both     |
| O60701    | UGDH_HUMAN  | UDP-glucose 6-dehydrogenase (UDP-Glc dehydrogenase) (UDP-GlcDH) (UDPGDH) (EC 1.1.1.22)                                 | Control  |
| Q9NYU2    | UGGG1_HUMAN | UDP-glucose:glycoprotein glucosyltransferase 1 (UGT1) (hUGT1) (EC 2.4.1.-) (UDP--Glc:glycoprotein glucosyltransferase) | Control  |
| Q16851    | UGPA_HUMAN  | UTP--glucose-1-phosphate uridylyltransferase (EC 2.7.7.9) (UDP-glucose pyrophosphorylase) (UDPGP) (UGPase)             | Control  |

**Table S2.** List of proteins classified as *Receptors* based on GO annotations

| Accession | Entry name  | Description                                                                                                                                                   | Sample   |
|-----------|-------------|---------------------------------------------------------------------------------------------------------------------------------------------------------------|----------|
| P30379    | 1B01_GORGO  | Class I histocompatibility antigen, Gogo-B*0101 alpha chain                                                                                                   | Control  |
| P30380    | 1B02_GORGO  | Class I histocompatibility antigen, Gogo-B*0102 alpha chain                                                                                                   | Control  |
| P30381    | 1B03_GORGO  | Class I histocompatibility antigen, Gogo-B*0103 alpha chain                                                                                                   | Control  |
| Q31612    | 1B73_HUMAN  | HLA class I histocompatibility antigen, B-73 alpha chain (MHC class I antigen B*73)                                                                           | Control  |
| O43707    | ACTN4_HUMAN | Alpha-actinin-4 (Non-muscle alpha-actinin 4)                                                                                                                  | Cytokine |
| P78536    | ADA17_HUMAN | Disintegrin and metalloproteinase domain-containing protein 17 (ADAM 17) (EC 3.4.24.86) (CD antigen CD156b)                                                   | Both     |
| Q61072    | ADAM9_MOUSE | Disintegrin and metalloproteinase domain-containing protein 9 (ADAM 9) (EC 3.4.24.-) (Meltrin-gamma)                                                          | Both     |
| Q8CJ12    | AGRG2_MOUSE | Adhesion G-protein coupled receptor G2 (G-protein coupled receptor 64) (Mouse epididymis-specific protein 6) (Me6)                                            | Control  |
| P30533    | AMRP_HUMAN  | Alpha-2-macroglobulin receptor-associated protein (Alpha-2-MRAP) (Low density lipoprotein receptor-related protein-associated protein 1) (RAP)                | Both     |
| P20594    | ANPRB_HUMAN | Atrial natriuretic peptide receptor 2 (EC 4.6.1.2) (Atrial natriuretic peptide receptor type B) (ANP-B) (ANPR-B) (NPR-B) (Guanylate cyclase B) (GC-B)         | Control  |
| Q9CZ52    | ANTR1_MOUSE | Anthrax toxin receptor 1 (Tumor endothelial marker 8)                                                                                                         | Both     |
| P79134    | ANXA6_BOVIN | Annexin A6 (Annexin VI) (Annexin-6)                                                                                                                           | Both     |
| Q03247    | APOE_BOVIN  | Apolipoprotein E (Apo-E)                                                                                                                                      | Both     |
| Q92888    | ARHG1_HUMAN | Rho guanine nucleotide exchange factor 1 (115 kDa guanine nucleotide exchange factor) (p115-RhoGEF) (p115RhoGEF) (Sub1.5)                                     | Control  |
| Q9WU60    | ATRN_MOUSE  | Attractin (Protein mahogany)                                                                                                                                  | Control  |
| P18075    | BMP7_HUMAN  | Bone morphogenetic protein 7 (BMP-7) (Osteogenic protein 1) (OP-1) (Eptotermin alfa)                                                                          | Cytokine |
| P34821    | BMP8A_MOUSE | Bone morphogenetic protein 8A (BMP-8A) (Osteogenic protein 2) (OP-2)                                                                                          | Cytokine |
| P55105    | BMP8B_MOUSE | Bone morphogenetic protein 8B (BMP-8B)                                                                                                                        | Cytokine |
| Q9BY67    | CADM1_HUMAN | Cell adhesion molecule 1 (Immunoglobulin superfamily member 4) (IgSF4) (Nectin-like protein 2) (NECL-2)                                                       | Both     |
| P28491    | CALR_PIG    | Calreticulin (CRP55) (Calregulin) (Endoplasmic reticulum resident protein 60) (ERp60) (HACBP)                                                                 | Both     |
| P27824    | CALX_HUMAN  | Calnexin (IP90) (Major histocompatibility complex class I antigen-binding protein p88) (p90)                                                                  | Control  |
| Q3ZBH3    | CD151_BOVIN | CD151 antigen (CD antigen CD151)                                                                                                                              | Both     |
| Q13740    | CD166_BOVIN | CD166 antigen (Activated leukocyte cell adhesion molecule) (CD antigen CD166)                                                                                 | Both     |
| Q5ZPR3    | CD276_HUMAN | CD276 antigen (4Ig-B7-H3) (B7 homolog 3) (B7-H3) (Costimulatory molecule) (CD antigen CD276)                                                                  | Both     |
| Q05078    | CD44_HORSE  | CD44 antigen (Extracellular matrix receptor III) (ECMR-III) (GP90 lymphocyte homing/adhesion receptor) (Hyaluronate receptor)                                 | Both     |
| Q9N0K1    | CD47_BOVIN  | Leukocyte surface antigen CD47 (Integrin-associated protein) (IAP) (CD antigen CD47)                                                                          | Both     |
| Q29482    | CLUS_HORSE  | Clusterin [Cleaved into: Clusterin beta chain; Clusterin alpha chain]                                                                                         | Both     |
| P02461    | CO3A1_HUMAN | Collagen alpha-1(III) chain                                                                                                                                   | Both     |
| Q8K4Q8    | COL12_MOUSE | Collectin-12 (Collectin placenta protein 1) (CL-P1) (Scavenger receptor with C-type lectin)                                                                   | Cytokine |
| O75131    | CPNE3_HUMAN | Copine-3 (Copine III)                                                                                                                                         | Control  |
| Q16832    | DDR2_HUMAN  | Discoidin domain-containing receptor 2 (Discoidin domain receptor 2) (EC 2.7.10.1) (CD167 antigen-like family member B)                                       | Both     |
| Q12959    | DLG1_HUMAN  | Disks large homolog 1 (Synapse-associated protein 97) (SAP-97) (SAP97) (hDlg)                                                                                 | Control  |
| Q15700    | DLG2_HUMAN  | Disks large homolog 2 (Channel-associated protein of synapse-110) (Chapsyn-110) (Postsynaptic density protein PSD-93)                                         | Control  |
| O43854    | EDIL3_HUMAN | EGF-like repeat and discoidin I-like domain-containing protein 3 (Developmentally-regulated endothelial cell locus 1 protein) (Integrin-binding protein DEL1) | Both     |
| P98172    | EFNB1_HUMAN | Ephrin-B1 (EFL-3) (ELK ligand) (ELK-L) (EPH-related receptor tyrosine kinase ligand 2) (LERK-2)                                                               | Both     |

**Table S2.** (continued)

| Accession | Entry name  | Description                                                                                                                                        | Sample   |
|-----------|-------------|----------------------------------------------------------------------------------------------------------------------------------------------------|----------|
| P00533    | EGFR_HUMAN  | Epidermal growth factor receptor (EC 2.7.10.1) (Proto-oncogene c-ErbB-1) (Receptor tyrosine-protein kinase erbB-1)                                 | Both     |
| P17813    | EGLN_HUMAN  | Endoglin (CD antigen CD105)                                                                                                                        | Both     |
| P14625    | ENPL_HUMAN  | Endoplasmic (94 kDa glucose-regulated protein) (GRP-94) (Heat shock protein 90 kDa beta member 1) (Tumor rejection antigen 1) (gp96 homolog)       | Both     |
| P22413    | ENPP1_HUMAN | Ectonucleotide pyrophosphatase/phosphodiesterase family member 1 (E-NPP 1) (Membrane component chromosome 6 surface marker 1)                      | Both     |
| Q5R5M5    | ENPP3_PONAB | Ectonucleotide pyrophosphatase/phosphodiesterase family member 3 (E-NPP 3) (Phosphodiesterase I beta) (PD-Ibeta)                                   | Control  |
| P29317    | EPHA2_HUMAN | Ephrin type-A receptor 2 (EC 2.7.10.1) (Epithelial cell kinase) (Tyrosine-protein kinase receptor ECK)                                             | Both     |
| P54764    | EPHA4_HUMAN | Ephrin type-A receptor 4 (EC 2.7.10.1) (EPH-like kinase 8) (EK8) (hEK8) (Tyrosine-protein kinase TYRO1) (Tyrosine-protein kinase receptor SEK)     | Both     |
| P54756    | EPHA5_HUMAN | Ephrin type-A receptor 5 (EC 2.7.10.1) (Brain-specific kinase) (EPH homology kinase 1) (EHK-1) (EPH-like kinase 7) (EK7) (hEK7)                    | Control  |
| O09127    | EPHA8_MOUSE | Ephrin type-A receptor 8 (EC 2.7.10.1) (EPH- and ELK-related kinase) (Tyrosine-protein kinase receptor EEK)                                        | Control  |
| Q5JZY3    | EPHAA_HUMAN | Ephrin type-A receptor 10 (EC 2.7.10.1)                                                                                                            | Control  |
| P54761    | EPHB4_MOUSE | Ephrin type-B receptor 4 (EC 2.7.10.1) (Developmental kinase 2) (mDK-2) (Hepatoma transmembrane kinase) (Tyrosine kinase MYK-1)                    | Both     |
| Q61851    | FGFR3_MOUSE | Fibroblast growth factor receptor 3 (FGFR-3) (EC 2.7.10.1) (Heparin-binding growth factor receptor) (CD antigen CD333)                             | Control  |
| P21333    | FLNA_HUMAN  | Filamin-A (FLN-A) (Actin-binding protein 280) (ABP-280) (Alpha-filamin) (Endothelial actin-binding protein) (Filamin-1) (Non-muscle filamin)       | Both     |
| O43155    | FLRT2_HUMAN | Leucine-rich repeat transmembrane protein FLRT2 (Fibronectin-like domain-containing leucine-rich transmembrane protein 2)                          | Both     |
| P02702    | FOLR1_BOVIN | Folate receptor alpha (FR-alpha) (Folate receptor 1) (Folate-binding protein 1) (FBP) (Milk folate-binding protein)                                | Cytokine |
| P14207    | FOLR2_HUMAN | Folate receptor beta (FR-beta) (Folate receptor 2) (Folate receptor, fetal/placental) (Placental folate-binding protein) (FBP)                     | Cytokine |
| Q9UP38    | FZD1_HUMAN  | Frizzled-1 (Fz-1) (hFz1) (FzE1)                                                                                                                    | Both     |
| Q14332    | FZD2_HUMAN  | Frizzled-2 (Fz-2) (hFz2) (FzE2)                                                                                                                    | Both     |
| O75084    | FZD7_HUMAN  | Frizzled-7 (Fz-7) (hFz7) (FzE3)                                                                                                                    | Both     |
| P04899    | GNAI2_HUMAN | Guanine nucleotide-binding protein G(i) subunit alpha-2 (Adenylate cyclase-inhibiting G alpha protein)                                             | Both     |
| P08754    | GNAI3_HUMAN | Guanine nucleotide-binding protein G(k) subunit alpha (G(i) alpha-3)                                                                               | Control  |
| Q9Y625    | GPC6_HUMAN  | Glypican-6 [Cleaved into: Secreted glypican-6]                                                                                                     | Control  |
| P32942    | ICAM3_HUMAN | Intercellular adhesion molecule 3 (ICAM-3) (CDw50) (ICAM-R) (CD antigen CD50)                                                                      | Control  |
| P08069    | IGF1R_HUMAN | Insulin-like growth factor 1 receptor (EC 2.7.10.1) (Insulin-like growth factor I receptor) (IGF-I receptor) (CD antigen CD221)                    | Both     |
| Q14005    | IL16_HUMAN  | Pro-interleukin-16 [Cleaved into: Interleukin-16 (IL-16) (Lymphocyte chemoattractant factor) (LCF)]                                                | Control  |
| P40189    | IL6RB_HUMAN | Interleukin-6 receptor subunit beta (IL-6 receptor subunit beta) (IL-6R subunit beta) (IL-6R-beta) (CD antigen CD130)                              | Control  |
| Q14974    | IMB1_HUMAN  | Importin subunit beta-1 (Importin-90) (Karyopherin subunit beta-1) (Nuclear factor p97) (Pore targeting complex 97 kDa subunit) (PTAC97)           | Both     |
| P06213    | INSR_HUMAN  | Insulin receptor (IR) (EC 2.7.10.1) (CD antigen CD220) [Cleaved into: Insulin receptor subunit alpha; Insulin receptor subunit beta]               | Cytokine |
| P56199    | ITA1_HUMAN  | Integrin alpha-1 (CD49 antigen-like family member A) (Laminin and collagen receptor) (VLA-1) (CD antigen CD49a)                                    | Both     |
| O75578    | ITA10_HUMAN | Integrin alpha-10                                                                                                                                  | Control  |
| Q9UKX5    | ITA11_HUMAN | Integrin alpha-11                                                                                                                                  | Both     |
| F1MMS9    | ITA3_BOVIN  | Integrin alpha-3 (CD49 antigen-like family member C) (Galactoprotein B3) (GAPB3) (VLA-3 subunit alpha) (CD antigen CD49c)                          | Both     |
| Q27977    | ITA5_BOVIN  | Integrin alpha-5 (Fibronectin receptor subunit alpha) (Integrin alpha-F) (VLA-5)                                                                   | Both     |
| P23229    | ITA6_HUMAN  | Integrin alpha-6 (CD49 antigen-like family member F) (VLA-6) (CD antigen CD49f)                                                                    | Both     |
| P43406    | ITAV_MOUSE  | Integrin alpha-V (Vitronectin receptor subunit alpha) (CD antigen CD51) [Cleaved into: Integrin alpha-V heavy chain; Integrin alpha-V light chain] | Control  |
| P53712    | ITB1_BOVIN  | Integrin beta-1 (Fibronectin receptor subunit beta) (VLA-4 subunit beta) (CD antigen CD29)                                                         | Both     |
| P32592    | ITB2_BOVIN  | Integrin beta-2 (Cell surface adhesion glycoproteins LFA-1/CR3/p150,95 subunit beta) (Complement receptor C3 subunit beta) (CD antigen CD18)       | Cytokine |



**Table S2.** (continued)

| Accession | Entry name  | Description                                                                                                                                                  | Sample   |
|-----------|-------------|--------------------------------------------------------------------------------------------------------------------------------------------------------------|----------|
| P80747    | ITB5_BOVIN  | Integrin beta-5                                                                                                                                              | Both     |
| P26010    | ITB7_HUMAN  | Integrin beta-7 (Gut homing receptor beta subunit)                                                                                                           | Both     |
| P31025    | LCN1_HUMAN  | Lipocalin-1 (Tear lipocalin) (Tlc) (Tear prealbumin) (TP) (von Ebner gland protein) (VEG protein)                                                            | Both     |
| P01131    | LDLR_BOVIN  | Low-density lipoprotein receptor (LDL receptor)                                                                                                              | Both     |
| P61793    | LPAR1_MOUSE | Lysophosphatidic acid receptor 1 (LPA receptor 1) (LPA-1) (Lysophosphatidic acid receptor Edg-2) (Rec1.3) (VZG-1)                                            | Both     |
| Q07954    | LRP1_HUMAN  | Prolow-density lipoprotein receptor-related protein 1 (LRP-1) (Alpha-2-macroglobulin receptor) (A2MR) (Apolipoprotein E receptor) (APOER) (CD antigen CD91)  | Both     |
| Q2QLA9    | MET_HORSE   | Hepatocyte growth factor receptor (HGF receptor) (EC 2.7.10.1) (HGF/SF receptor) (Proto-oncogene c-Met)                                                      | Both     |
| Q2HJ49    | MOES_BOVIN  | Moesin (Membrane-organizing extension spike protein)                                                                                                         | Control  |
| P08169    | MPRI_BOVIN  | Cation-independent mannose-6-phosphate receptor (300 kDa mannose 6-phosphate receptor) (Insulin-like growth factor 2 receptor) (CD antigen CD222)            | Control  |
| P35579    | MYH9_HUMAN  | Myosin-9 (Cellular myosin heavy chain, type A) (Myosin heavy chain 9) (Myosin heavy chain, non-muscle IIa)                                                   | Control  |
| Q15223    | NECT1_HUMAN | Nectin-1 (Herpes virus entry mediator C) (Nectin cell adhesion molecule 1) (CD antigen CD111)                                                                | Both     |
| Q9NQ53    | NECT3_HUMAN | Nectin-3 (CDw113) (Nectin cell adhesion molecule 3) (Poliovirus receptor-related protein 3) (CD antigen CD113)                                               | Both     |
| Q8NFZ4    | NLGN2_HUMAN | Neuroigin-2                                                                                                                                                  | Control  |
| Q04721    | NOTC2_HUMAN | Neurogenic locus notch homolog protein 2 (Notch 2)                                                                                                           | Both     |
| Q9Y639    | NPTN_HUMAN  | Neuroplastin (Stromal cell-derived receptor 1) (SDR-1)                                                                                                       | Both     |
| O14786    | NRP1_HUMAN  | Neuropilin-1 (Vascular endothelial cell growth factor 165 receptor) (CD antigen CD304)                                                                       | Cytokine |
| O60462    | NRP2_HUMAN  | Neuropilin-2 (Vascular endothelial cell growth factor 165 receptor 2)                                                                                        | Both     |
| P16234    | PGFRA_HUMAN | Platelet-derived growth factor receptor alpha (PDGF-R-alpha) (PDGFR-alpha) (EC 2.7.10.1) (Alpha platelet-derived growth factor receptor) (CD antigen CD140a) | Control  |
| P09619    | PGFRB_HUMAN | Platelet-derived growth factor receptor beta (PDGF-R-beta) (PDGFR-beta) (EC 2.7.10.1) (CD antigen CD140b)                                                    | Both     |
| Q8SPJ1    | PLAK_BOVIN  | Junction plakoglobin (Desmoplakin III) (Desmoplakin-3)                                                                                                       | Both     |
| Q9UIW2    | PLXA1_HUMAN | Plexin-A1 (Semaphorin receptor NOV)                                                                                                                          | Both     |
| O43157    | PLXB1_HUMAN | Plexin-B1 (Semaphorin receptor SEP)                                                                                                                          | Cytokine |
| O15031    | PLXB2_HUMAN | Plexin-B2 (MM1)                                                                                                                                              | Both     |
| P49927    | PRIO_PIG    | Major prion protein (PrP) (CD antigen CD230)                                                                                                                 | Cytokine |
| Q1LZF7    | PTH1R_BOVIN | Parathyroid hormone/parathyroid hormone-related peptide receptor (PTH/PTHrP type I receptor) (PTH1 receptor)                                                 | Control  |
| Q13308    | PTK7_HUMAN  | Inactive tyrosine-protein kinase 7 (Colon carcinoma kinase 4)                                                                                                | Both     |
| P18433    | PTPRA_HUMAN | Receptor-type tyrosine-protein phosphatase alpha (Protein-tyrosine phosphatase alpha) (R-PTP-alpha) (EC 3.1.3.48)                                            | Both     |
| P23470    | PTPRG_HUMAN | Receptor-type tyrosine-protein phosphatase gamma (Protein-tyrosine phosphatase gamma) (R-PTP-gamma) (EC 3.1.3.48)                                            | Both     |
| Q12913    | PTPRJ_HUMAN | Receptor-type tyrosine-protein phosphatase eta (Protein-tyrosine phosphatase eta) (R-PTP-eta) (EC 3.1.3.48) (CD antigen CD148)                               | Control  |
| P28828    | PTPRM_MOUSE | Receptor-type tyrosine-protein phosphatase mu (Protein-tyrosine phosphatase mu) (R-PTP-mu) (EC 3.1.3.48)                                                     | Control  |
| Q92626    | PXDN_HUMAN  | Peroxidasin homolog (EC 1.11.1.7) (Melanoma-associated antigen MG50) (Vascular peroxidase 1) (p53-responsive gene 2 protein)                                 | Cytokine |
| P20338    | RAB4A_HUMAN | Ras-related protein Rab-4A                                                                                                                                   | Cytokine |
| O95980    | RECK_HUMAN  | Reversion-inducing cysteine-rich protein with Kazal motifs (hRECK) (Suppressor of tumorigenicity 15 protein)                                                 | Both     |
| Q9Y6N7    | ROBO1_HUMAN | Roundabout homolog 1 (Deleted in U twenty twenty) (H-Robo-1)                                                                                                 | Both     |
| Q01974    | ROR2_HUMAN  | Tyrosine-protein kinase transmembrane receptor ROR2 (EC 2.7.10.1) (Neurotrophic tyrosine kinase, receptor-related 2)                                         | Control  |
| P08922    | ROS1_HUMAN  | Proto-oncogene tyrosine-protein kinase ROS (EC 2.7.10.1) (Proto-oncogene c-Ros)                                                                              | Control  |
| P31151    | S10A7_HUMAN | Protein S100-A7 (Psoriasin) (S100 calcium-binding protein A7)                                                                                                | Both     |

**Table S2.** (continued)

| Accession | Entry name  | Description                                                                                                                                 | Sample   |
|-----------|-------------|---------------------------------------------------------------------------------------------------------------------------------------------|----------|
| P06702    | S10A9_HUMAN | Protein S100-A9 (Calgranulin-B) (Calprotectin L1H subunit) (Leukocyte L1 complex heavy chain)                                               | Cytokine |
| Q8WUM9    | S20A1_HUMAN | Sodium-dependent phosphate transporter 1 (Phosphate transporter 1) (PiT-1) (Solute carrier family 20 member 1)                              | Both     |
| Q6AZY7    | SCAR3_HUMAN | Scavenger receptor class A member 3 (Cellular stress response gene protein)                                                                 | Control  |
| A5D7B7    | SEPR_BOVIN  | Prolyl endopeptidase FAP (EC 3.4.21.26) (Dipeptidyl peptidase FAP) (EC 3.4.14.5) (Fibroblast activation protein alpha)                      | Both     |
| Q2KJH6    | SERPH_BOVIN | Serpin H1 (Collagen-binding protein) (Colligin)                                                                                             | Both     |
| Q6PHU5    | SORT_MOUSE  | Sortilin (Neurotensin receptor 3) (NTR3) (mNTR3)                                                                                            | Control  |
| Q2V905    | TFR1_HORSE  | Transferrin receptor protein 1 (TR) (TfR) (TfR1) (TfR) (CD antigen CD71)                                                                    | Both     |
| Q03167    | TGBR3_HUMAN | Transforming growth factor beta receptor type 3 (TGF-beta receptor type 3) (TGFR-3) (Betaglycan)                                            | Control  |
| P37173    | TGFR2_HUMAN | TGF-beta receptor type-2 (TGFR-2) (EC 2.7.11.30) (TGF-beta type II receptor)                                                                | Control  |
| P04216    | THY1_HUMAN  | Thy-1 membrane glycoprotein (CDw90) (Thy-1 antigen) (CD antigen CD90)                                                                       | Control  |
| Q9Y490    | TLN1_HUMAN  | Talin-1                                                                                                                                     | Both     |
| P24627    | TRFL_BOVIN  | Lactotransferrin (Lactoferrin) (EC 3.4.21.-) [Cleaved into: Lactoferricin-B (Lfcin-B)]                                                      | Cytokine |
| Q28178    | TSP1_BOVIN  | Thrombospondin-1 (Glycoprotein G)                                                                                                           | Both     |
| P30530    | UFO_HUMAN   | Tyrosine-protein kinase receptor UFO (EC 2.7.10.1) (AXL oncogene)                                                                           | Both     |
| Q28260    | VCAM1_CANLF | Vascular cell adhesion protein 1 (V-CAM 1) (VCAM-1) (CD antigen CD106)                                                                      | Both     |
| P98156    | VLDLR_MOUSE | Very low-density lipoprotein receptor (VLDL receptor) (VLDL-R)                                                                              | Control  |
| Q2HJG5    | VPS35_BOVIN | Vacuolar protein sorting-associated protein 35 (Vesicle protein sorting 35)                                                                 | Both     |
| Q9EQH3    | VPS35_MOUSE | Vacuolar protein sorting-associated protein 35 (Maternal-embryonic 3) (Vesicle protein sorting 35)                                          | Control  |
| P04004    | VTNC_HUMAN  | Vitronectin (VN) (S-protein) (Serum-spreading factor) (V75) [Cleaved into: Vitronectin V65 subunit; Vitronectin V10 subunit; Somatomedin-B] | Control  |

**Table S3.** List of proteins classified as *Transporters* based on GO annotations

| Accession | Entry name  | Description                                                                                                                                                     | Sample   |
|-----------|-------------|-----------------------------------------------------------------------------------------------------------------------------------------------------------------|----------|
| P62258    | 1433E_HUMAN | 14-3-3 protein epsilon (14-3-3E)                                                                                                                                | Both     |
| P08195    | 4F2_HUMAN   | 4F2 cell-surface antigen heavy chain (4F2hc) (4F2 heavy chain antigen) (Solute carrier family 3 member 2) (CD antigen CD98)                                     | Both     |
| Q95JC7    | AAAT_BOVIN  | Neutral amino acid transporter B(0) (ATB(0)) (Sodium-dependent neutral amino acid transporter type 2) (Solute carrier family 1 member 5)                        | Both     |
| Q4KMQ2    | ANO6_HUMAN  | Anoctamin-6 (Small-conductance calcium-activated nonselective cation channel) (SCAN channel) (Transmembrane protein 16F)                                        | Both     |
| P04272    | ANXA2_BOVIN | Annexin A2 (Annexin II) (Annexin-2)(Calpactin-1 heavy chain) (Chromobindin-8) (Lipocortin II)                                                                   | Both     |
| P14824    | ANXA6_MOUSE | Annexin A6 (67 kDa calelectrin) (Annexin VI) (Annexin-6) (Calphobindin-II) (Chromobindin-20) (Lipocortin VI)                                                    | Cytokine |
| P54707    | AT12A_HUMAN | Potassium-transporting ATPase alpha chain 2 (EC 7.2.2.19) (Non-gastric H(+)/K(+) ATPase subunit alpha) (Proton pump)                                            | Cytokine |
| P18907    | AT1A1_HORSE | Sodium/potassium-transporting ATPase subunit alpha-1 (Sodium pump subunit alpha-1) (EC 7.2.2.13) (Na(+)/K(+) ATPase alpha-1 subunit)                            | Both     |
| Q13733    | AT1A4_HUMAN | Sodium/potassium-transporting ATPase subunit alpha-4 (Na(+)/K(+) ATPase alpha-4 subunit) (EC 7.2.2.13) (Sodium pump subunit alpha-4)                            | Both     |
| P20020    | AT2B1_HUMAN | Plasma membrane calcium-transporting ATPase 1 (EC 7.2.2.10) (Plasma membrane calcium ATPase isoform 1) (PMCA1) (Plasma membrane calcium pump isoform 1)         | Both     |
| P06576    | ATPB_HUMAN  | ATP synthase subunit beta, mitochondrial (EC 7.1.2.2) (ATP synthase F1 subunit beta)                                                                            | Control  |
| Q6SJP2    | B3A2_HORSE  | Anion exchange protein 2 (AE 2) (Anion exchanger 2) (Non-erythroid band 3-like protein) (Solute carrier family 4 member 2)                                      | Both     |
| P00974    | BPT1_BOVIN  | Pancreatic trypsin inhibitor (Aprotinin) (Basic protease inhibitor) (BPI) (BPTI)                                                                                | Both     |
| P54289    | CA2D1_HUMAN | Voltage-dependent calcium channel subunit alpha-2/delta-1 (Voltage-gated calcium channel subunit alpha-2/delta-1)                                               | Both     |
| O60840    | CAC1F_HUMAN | Voltage-dependent L-type calcium channel subunit alpha-1F (Voltage-gated calcium channel subunit alpha Cav1.4)                                                  | Control  |
| P0DP24    | CALM2_HUMAN | Calmodulin-2                                                                                                                                                    | Control  |
| P02666    | CASB_BOVIN  | Beta-casein [Cleaved into: Casoparan; Antioxidant peptide; Casohypotensin]                                                                                      | Both     |
| Q9NV96    | CC50A_HUMAN | Cell cycle control protein 50A (P4-ATPase flippase complex beta subunit TMEM30A) (Transmembrane protein 30A)                                                    | Both     |
| Q9XSA7    | CLIC4_BOVIN | Chloride intracellular channel protein 4 (Intracellular chloride ion channel protein p64H1)                                                                     | Control  |
| Q9UBL6    | CPNE7_HUMAN | Copine-7 (Copine VII)                                                                                                                                           | Control  |
| P52569    | CTR2_HUMAN  | Cationic amino acid transporter 2 (CAT-2) (CAT2) (Low affinity cationic amino acid transporter 2) (Solute carrier family 7 member 2)                            | Cytokine |
| Q5T3F8    | CSC12_HUMAN | CSC1-like protein 2 (Transmembrane protein 63B)                                                                                                                 | Control  |
| P56564    | EAA1_MOUSE  | Excitatory amino acid transporter 1 (Sodium-dependent glutamate/aspartate transporter 1) (Solute carrier family 1 member 3)                                     | Both     |
| P11166    | GTR1_HUMAN  | Solute carrier family 2, facilitated glucose transporter member 1 (Glucose transporter type 1, erythrocyte/brain) (GLUT-1) (HepG2 glucose transporter)          | Both     |
| Q8TDB8    | GTR14_HUMAN | Solute carrier family 2, facilitated glucose transporter member 14 (Glucose transporter type 14) (GLUT-14)                                                      | Cytokine |
| Q9XSC2    | GTR3_RABIT  | Solute carrier family 2, facilitated glucose transporter member 3 (Glucose transporter type 3, brain) (GLUT-3) (Fragment)                                       | Both     |
| P58353    | GTR5_BOVIN  | Solute carrier family 2, facilitated glucose transporter member 5 (Fructose transporter) (Glucose transporter type 5, small intestine) (GLUT-5)                 | Control  |
| Q8WN96    | ITPR2_BOVIN | Inositol 1,4,5-trisphosphate receptor type 2 (IP3 receptor isoform 2) (IP3R 2) (InsP3R2) (Type 2 inositol 1,4,5-trisphosphate receptor) (Type 2 InsP3 receptor) | Control  |
| Q8IWT6    | LRC8A_HUMAN | Volume-regulated anion channel subunit LRRC8A (Leucine-rich repeat-containing protein 8A) (Swelling protein 1)                                                  | Cytokine |
| Q7L1W4    | LRC8D_HUMAN | Volume-regulated anion channel subunit LRRC8D (Leucine-rich repeat-containing protein 5) (Leucine-rich repeat-containing protein 8D)                            | Cytokine |
| O15427    | MOT4_HUMAN  | Monocarboxylate transporter 4 (MCT 4) (Solute carrier family 16 member 3)                                                                                       | Both     |
| Q00325    | MPCP_HUMAN  | Phosphate carrier protein, mitochondrial (Phosphate transport protein) (PTP) (Solute carrier family 25 member 3)                                                | Both     |
| Q8HXQ5    | MRP1_BOVIN  | Multidrug resistance-associated protein 1 (ATP-binding cassette sub-family C member 1) (Leukotriene C(4) transporter) (LTC4 transporter)                        | Both     |
| Q63120    | MRP2_RAT    | Canalicular multispecific organic anion transporter 1 (Canalicular multidrug resistance protein) (Multidrug resistance-associated protein 2)                    | Cytokine |
| Q92508    | PIEZ1_HUMAN | Piezo-type mechanosensitive ion channel component 1 (Membrane protein induced by beta-amyloid treatment) (Mib) (Protein FAM38A)                                 | Both     |

**Table S3.** (continued)

| Accession | Entry name   | Description                                                                                                                                                                                   | Sample   |
|-----------|--------------|-----------------------------------------------------------------------------------------------------------------------------------------------------------------------------------------------|----------|
| P62935    | PPIA_BOVIN   | Peptidyl-prolyl cis-trans isomerase A (PPIase A) (EC 5.2.1.8) (Cyclophilin A)                                                                                                                 | Both     |
| P60902    | S10AA_BOVIN  | Protein S100-A10 (Calpactin I light chain) (Calpactin-1 light chain) (Cellular ligand of annexin II) (S100 calcium-binding protein A10)                                                       | Control  |
| P55011    | S12A2_HUMAN  | Solute carrier family 12 member 2 (Basolateral Na-K-Cl symporter) (Bumetanide-sensitive sodium-(potassium)-chloride cotransporter 1)                                                          | Both     |
| Q9UP95    | S12A4_HUMAN  | Solute carrier family 12 member 4 (Electroneutral potassium-chloride cotransporter 1) (Erythroid K-Cl cotransporter 1) (hKCC1)                                                                | Both     |
| Q65AC2    | S26A2_HORSE  | Sulfate transporter (Solute carrier family 26 member 2)                                                                                                                                       | Control  |
| A2VE31    | S38A2_BOVIN  | Sodium-coupled neutral amino acid transporter 2 (Amino acid transporter A2) (Solute carrier family 38 member 2)                                                                               | Cytokine |
| Q5E9S9    | S38A5_BOVIN  | Sodium-coupled neutral amino acid transporter 5 (Solute carrier family 38 member 5) (System N transporter 2)                                                                                  | Cytokine |
| A5D7L5    | S39AE_BOVIN  | Zinc transporter ZIP14 (Solute carrier family 39 member 14) (Zrt- and Irt-like protein 14) (ZIP-14)                                                                                           | Both     |
| Q9Y6R1    | S4A4_HUMAN   | Electrogenic sodium bicarbonate cotransporter 1 (Sodium bicarbonate cotransporter) (Na <sup>+</sup> )/HCO <sub>3</sub> <sup>-</sup> cotransporter) (Solute carrier family 4 member 4) (kNBC1) | Both     |
| Q8BTY2    | S4A7_MOUSE   | Sodium bicarbonate cotransporter 3 (Solute carrier family 4 member 7)                                                                                                                         | Both     |
| P53793    | SC5A3_BOVIN  | Sodium/myo-inositol cotransporter (Na <sup>+</sup> )/myo-inositol cotransporter) (Sodium/myo-inositol transporter 1) (SMIT1) (Solute carrier family 5 member 3)                               | Both     |
| Q9Y289    | SC5A6_HUMAN  | Sodium-dependent multivitamin transporter (Na <sup>+</sup> -dependent multivitamin transporter) (Solute carrier family 5 member 6)                                                            | Control  |
| P23791    | SL9A1_RABIT  | Sodium/hydrogen exchanger 1 (Na <sup>+</sup> )/H <sup>+</sup> exchanger 1) (NHE-1) (Solute carrier family 9 member 1)                                                                         | Both     |
| Q92581    | SL9A6_HUMAN  | Sodium/hydrogen exchanger 6 (Na <sup>+</sup> )/H <sup>+</sup> exchanger 6) (NHE-6) (Solute carrier family 9 member 6)                                                                         | Control  |
| Q9UHE8    | STEAP1_HUMAN | Metalloreductase STEAP1 (EC 1.16.1.-) (Six-transmembrane epithelial antigen of prostate 1)                                                                                                    | Control  |
| Q9Y6M5    | ZNT1_HUMAN   | Zinc transporter 1 (ZnT-1) (Solute carrier family 30 member 1)                                                                                                                                | Cytokine |

**Table S4.** List of proteins that could not be classified into any of the previous categories based on GO annotations (listed as *Unclassified*)

| Accession | Entry name  | Description                                                                                                                               | Sample   |
|-----------|-------------|-------------------------------------------------------------------------------------------------------------------------------------------|----------|
| P30461    | 1B13_HUMAN  | HLA class I histocompatibility antigen, B-13 alpha chain (MHC class I antigen B*13)                                                       | Control  |
| P34955    | A1AT_BOVIN  | Alpha-1-antiproteinase (Alpha-1-antitrypsin) (Alpha-1-proteinase inhibitor) (Serpin A1)                                                   | Cytokine |
| Q7SIH1    | A2MG_BOVIN  | Alpha-2-macroglobulin (Alpha-2-M)                                                                                                         | Control  |
| P84336    | ACTB_CAMDR  | Actin, cytoplasmic 1 (Beta-actin) [Cleaved into: Actin, cytoplasmic 1, N-terminally processed]                                            | Cytokine |
| Q562R1    | ACTBL_HUMAN | Beta-actin-like protein 2 (Kappa-actin)                                                                                                   | Control  |
| Q09666    | AHNK_HUMAN  | Neuroblast differentiation-associated protein AHNAK (Desmoyokin)                                                                          | Both     |
| P02769    | ALBU_BOVIN  | Serum albumin (BSA) (allergen Bos d 6)                                                                                                    | Both     |
| Q4R4H7    | ANXA5_MACFA | Annexin A5 (Annexin V) (Annexin-5)                                                                                                        | Both     |
| P13928    | ANXA8_HUMAN | Annexin A8 (Annexin VIII) (Annexin-8) (Vascular anticoagulant-beta) (VAC-beta)                                                            | Control  |
| Q5E9I6    | ARF3_BOVIN  | ADP-ribosylation factor 3                                                                                                                 | Control  |
| Q3SZF2    | ARF4_BOVIN  | ADP-ribosylation factor 4                                                                                                                 | Both     |
| Q9UPA5    | BSN_HUMAN   | Protein bassoon (Zinc finger protein 231)                                                                                                 | Control  |
| Q05682    | CALD1_HUMAN | Caldesmon (CDM)                                                                                                                           | Both     |
| O43852    | CALU_HUMAN  | Calumenin (Crocabin) (IEF SSP 9302)                                                                                                       | Both     |
| P02662    | CASA1_BOVIN | Alpha-S1-casein (allergen Bos d 8) [Cleaved into: Antioxidant peptide]                                                                    | Both     |
| P02663    | CASA2_BOVIN | Alpha-S2-casein [Cleaved into: Casocidin-1 (Casocidin-I)]                                                                                 | Both     |
| P02668    | CASK_BOVIN  | Kappa-casein [Cleaved into: Casoxin-C; Casoxin-6; Casoxin-A; Casoxin-B; Casoplatelin]                                                     | Both     |
| Q6YHK3    | CD109_HUMAN | CD109 antigen (150 kDa TGF-beta-1-binding protein) (C3 and PZP-like alpha-2-macroglobulin domain-containing protein 7) (CD antigen CD109) | Both     |
| Q27954    | COPA_BOVIN  | Coatomer subunit alpha (Alpha-coat protein) (Alpha-COP) (HEP-COP) (HEPCOP) [Cleaved into: Xenin (Xenopsin-related peptide); Proxenin]     | Control  |
| A0JN39    | COPB_BOVIN  | Coatomer subunit beta (Beta-coat protein) (Beta-COP)                                                                                      | Cytokine |
| Q96FN4    | CPNE2_HUMAN | Copine-2 (Copine II)                                                                                                                      | Control  |
| Q96A23    | CPNE4_HUMAN | Copine-4 (Copine IV) (Copine-8)                                                                                                           | Control  |
| Q9HCH3    | CPNE5_HUMAN | Copine-5 (Copine V)                                                                                                                       | Control  |
| Q2KH1     | CPNE6_BOVIN | Copine-6 (Copine VI)                                                                                                                      | Control  |
| Q86YQ8    | CPNE8_HUMAN | Copine-8 (Copine VIII)                                                                                                                    | Control  |
| Q8IYJ1    | CPNE9_HUMAN | Copine-9 (Copine IX)                                                                                                                      | Control  |
| Q96CG8    | CTHR1_HUMAN | Collagen triple helix repeat-containing protein 1 (Protein NMTC1)                                                                         | Control  |
| Q6UVK1    | CSPG4_HUMAN | Chondroitin sulfate proteoglycan 4 (Chondroitin sulfate proteoglycan NG2)                                                                 | Both     |
| Q29243    | DAG1_PIG    | Dystroglycan (Dystrophin-associated glycoprotein 1) [Cleaved into: Alpha-dystroglycan (Alpha-DG); Beta-dystroglycan (Beta-DG)]            | Both     |
| Q14204    | DYHC1_HUMAN | Cytoplasmic dynein 1 heavy chain 1 (Cytoplasmic dynein heavy chain 1) (Dynein heavy chain, cytosolic)                                     | Both     |
| Q58DR6    | EMP3_BOVIN  | Epithelial membrane protein 3 (EMP-3)                                                                                                     | Both     |
| Q01844    | EWS_HUMAN   | RNA-binding protein EWS (EWS oncogene) (Ewing sarcoma breakpoint region 1 protein)                                                        | Both     |
| Q5M7W6    | F234A_RAT   | Protein FAM234A (Protein ITFG3)                                                                                                           | Control  |
| P12763    | FETUA_BOVIN | Alpha-2-HS-glycoprotein (Asialofetuin) (Fetuin-A)                                                                                         | Both     |
| Q9P2B2    | FPRP_HUMAN  | Prostaglandin F2 receptor negative regulator (CD9 partner 1) (CD9P-1) (Glu-Trp-Ile EWI motif-containing protein F) (CD antigen CD315)     | Both     |

**Table S4.** (continued)

| Accession | Entry name  | Description                                                                                                                                        | Sample   |
|-----------|-------------|----------------------------------------------------------------------------------------------------------------------------------------------------|----------|
| P35052    | GPC1_HUMAN  | Glypican-1 [Cleaved into: Secreted glypican-1]                                                                                                     | Control  |
| A2AJ76    | HMCN2_MOUSE | Hemicentin-2                                                                                                                                       | Control  |
| Q86YZ3    | HORN_HUMAN  | Homerin                                                                                                                                            | Both     |
| Q9GKX8    | HS90B_HORSE | Heat shock protein HSP 90-beta                                                                                                                     | Both     |
| P34932    | HSP74_HUMAN | Heat shock 70 kDa protein 4 (HSP70RY) (Heat shock 70-related protein APG-2)                                                                        | Control  |
| Q9Y4L1    | HYOU1_HUMAN | Hypoxia up-regulated protein 1 (150 kDa oxygen-regulated protein) (ORP-150) (170 kDa glucose-regulated protein) (GRP-170)                          | Both     |
| P13646    | K1C13_HUMAN | Keratin, type I cytoskeletal 13 (Cytokeratin-13) (CK-13) (Keratin-13) (K13)                                                                        | Both     |
| Q04695    | K1C17_HUMAN | Keratin, type I cytoskeletal 17 (39.1) (Cytokeratin-17) (CK-17) (Keratin-17) (K17)                                                                 | Both     |
| P08728    | K1C19_BOVIN | Keratin, type I cytoskeletal 19 (Cytokeratin-19) (CK-19) (Keratin-19) (K19)                                                                        | Both     |
| Q2M2I5    | K1C24_HUMAN | Keratin, type I cytoskeletal 24 (Cytokeratin-24) (CK-24) (Keratin-24) (K24) (Type I keratin-24)                                                    | Control  |
| P04264    | K2C1_HUMAN  | Keratin, type II cytoskeletal 1 (67 kDa cytokeratin) (Cytokeratin-1) (CK-1) (Hair alpha protein) (Keratin-1) (K1) (Type-II keratin Kb1)            | Both     |
| A5A6M6    | K2C1_PANTR  | Keratin, type II cytoskeletal 1 (Cytokeratin-1) (CK-1) (Keratin-1) (K1) (Type-II keratin Kb1)                                                      | Control  |
| Q7Z794    | K2C1B_HUMAN | Keratin, type II cytoskeletal 1b (Cytokeratin-1B) (CK-1B) (Keratin-77) (K77) (Type-II keratin Kb39)                                                | Both     |
| P12035    | K2C3_HUMAN  | Keratin, type II cytoskeletal 3 (65 kDa cytokeratin) (Cytokeratin-3) (CK-3) (Keratin-3) (K3) (Type-II keratin Kb3)                                 | Cytokine |
| P19013    | K2C4_HUMAN  | Keratin, type II cytoskeletal 4 (Cytokeratin-4) (CK-4) (Keratin-4) (K4) (Type-II keratin Kb4)                                                      | Both     |
| P48668    | K2C6C_HUMAN | Keratin, type II cytoskeletal 6C (Cytokeratin-6C) (CK-6C) (Cytokeratin-6E) (CK-6E) (Keratin K6h) (Keratin-6C) (K6C) (Type-II keratin Kb12)         | Both     |
| Q8N1N4    | K2C78_HUMAN | Keratin, type II cytoskeletal 78 (Cytokeratin-78) (CK-78) (Keratin-5b) (Keratin-78) (K78) (Type-II keratin Kb40)                                   | Both     |
| P05787    | K2C8_HUMAN  | Keratin, type II cytoskeletal 8 (Cytokeratin-8) (CK-8) (Keratin-8) (K8) (Type-II keratin Kb8)                                                      | Cytokine |
| Q5T749    | KPRP_HUMAN  | Keratinocyte proline-rich protein (hKPRP)                                                                                                          | Both     |
| P02754    | LACB_BOVIN  | Beta-lactoglobulin (Beta-LG) (allergen Bos d 5)                                                                                                    | Both     |
| P13473    | LAMP2_HUMAN | Lysosome-associated membrane glycoprotein 2 (LAMP-2) (CD107 antigen-like family member B) (LGP-96) (CD antigen CD107b)                             | Both     |
| Q5VSP4    | LC1L1_HUMAN | Putative lipocalin 1-like protein 1 (Lipocalin 1-like pseudogene 1)                                                                                | Both     |
| P49257    | LMAN1_HUMAN | Protein ERGIC-53 (ER-Golgi intermediate compartment 53 kDa protein) (Gp58) (Intracellular mannose-specific lectin MR60) (Lectin mannose-binding 1) | Cytokine |
| P61626    | LYSC_HUMAN  | Lysozyme C (EC 3.2.1.17) (1,4-beta-N-acetylmuramidase C)                                                                                           | Cytokine |
| P12067    | LYSC1_PIG   | Lysozyme C-1 (EC 3.2.1.17) (1,4-beta-N-acetylmuramidase C)                                                                                         | Cytokine |
| P12069    | LYSC3_PIG   | Lysozyme C-3 (EC 3.2.1.17) (1,4-beta-N-acetylmuramidase C)                                                                                         | Cytokine |
| P26042    | MOES_PIG    | Moesin (Membrane-organizing extension spike protein)                                                                                               | Control  |
| Q32PI9    | MPZL1_BOVIN | Myelin protein zero-like protein 1                                                                                                                 | Control  |
| Q9UKN7    | MYO15_HUMAN | Unconventional myosin-XV (Unconventional myosin-15)                                                                                                | Control  |
| Q3SYX0    | NDRG1_BOVIN | Protein NDRG1 (N-myc downstream-regulated gene 1 protein)                                                                                          | Control  |
| Q96TA1    | NIBL1_HUMAN | Niban-like protein 1 (Meg-3) (Melanoma invasion by ERK) (MINERVA) (Protein FAM129B)                                                                | Control  |
| Q02818    | NUCB1_HUMAN | Nucleobindin-1 (CALNUC)                                                                                                                            | Control  |
| Q02819    | NUCB1_MOUSE | Nucleobindin-1 (CALNUC)                                                                                                                            | Both     |
| P80303    | NUCB2_HUMAN | Nucleobindin-2 (DNA-binding protein NEFA) (Epididymis secretory protein Li 109) (Gastric cancer antigen Zg4) (Prepronesfatin)                      | Both     |
| P51178    | PLCD1_HUMAN | 1-phosphatidylinositol 4,5-bisphosphate phosphodiesterase delta-1 (EC 3.1.4.11) (Phosphoinositide phospholipase C-delta-1)                         | Both     |
| Q5UJG1    | PRIO_ANTCE  | Major prion protein (PrP) (CD antigen CD230)                                                                                                       | Both     |
| Q16378    | PROL4_HUMAN | Proline-rich protein 4 (Lacrimal proline-rich protein) (Nasopharyngeal carcinoma-associated proline-rich protein 4)                                | Control  |

**Table S4.** (continued)

| Accession | Entry name  | Description                                                                                                                                                | Sample   |
|-----------|-------------|------------------------------------------------------------------------------------------------------------------------------------------------------------|----------|
| O77691    | S10A6_HORSE | Protein S100-A6 (Calcyclin) (S100 calcium-binding protein A6)                                                                                              | Both     |
| O14828    | SCAM3_HUMAN | Secretory carrier-associated membrane protein 3 (Secretory carrier membrane protein 3)                                                                     | Control  |
| Q58DD4    | SDC2_BOVIN  | Syndecan-2 (SYND2) (CD antigen CD362)                                                                                                                      | Cytokine |
| O75056    | SDC3_HUMAN  | Syndecan-3 (SYND3)                                                                                                                                         | Both     |
| Q6UXD5    | SE6L2_HUMAN | Seizure 6-like protein 2                                                                                                                                   | Control  |
| Q9NRX5    | SERC1_HUMAN | Serine incorporator 1 (Tumor differentially expressed protein 1-like) (Tumor differentially expressed protein 2)                                           | Both     |
| Q16585    | SGCB_HUMAN  | Beta-sarcoglycan (Beta-SG) (43 kDa dystrophin-associated glycoprotein) (43DAG) (A3b)                                                                       | Control  |
| Q92629    | SGCD_HUMAN  | Delta-sarcoglycan (Delta-SG) (35 kDa dystrophin-associated glycoprotein) (35DAG)                                                                           | Both     |
| P81125    | SNAA_BOVIN  | Alpha-soluble NSF attachment protein (SNAP-alpha) (N-ethylmaleimide-sensitive factor attachment protein alpha)                                             | Control  |
| Q96P63    | SPB12_HUMAN | Serpin B12                                                                                                                                                 | Control  |
| Q6NZ63    | STEAL_HUMAN | STEAP family member 1B                                                                                                                                     | Control  |
| P27105    | STOM_HUMAN  | Erythrocyte band 7 integral membrane protein (Protein 7.2b) (Stomatin)                                                                                     | Both     |
| Q16563    | SYPL1_HUMAN | Synaptophysin-like protein 1 (Pantophysin)                                                                                                                 | Both     |
| Q5E971    | TMEDA_BOVIN | Transmembrane emp24 domain-containing protein 10 (21 kDa transmembrane-trafficking protein)                                                                | Control  |
| Q92973    | TNPO1_HUMAN | Transportin-1 (Importin beta-2) (Karyopherin beta-2) (M9 region interaction protein) (MIP)                                                                 | Cytokine |
| Q7L0X0    | TRIL_HUMAN  | TLR4 interactor with leucine rich repeats (Leucine-rich repeat-containing protein KIAA0644)                                                                | Control  |
| P07477    | TRY1_HUMAN  | Trypsin-1 (EC 3.4.21.4) (Beta-trypsin) (Cationic trypsinogen) (Serine protease 1) (Trypsin I) [Cleaved into: Alpha-trypsin chain 1; Alpha-trypsin chain 2] | Control  |
| Q32KU6    | TSN6_BOVIN  | Tetraspanin-6 (Tspan-6)                                                                                                                                    | Control  |
| P0CG48    | UBC_HUMAN   | Polyubiquitin-C [Cleaved into: Ubiquitin]                                                                                                                  | Control  |
| Q0VCY1    | VAPA_BOVIN  | Vesicle-associated membrane protein-associated protein A (VAMP-A) (VAMP-associated protein A) (VAP-A)                                                      | Cytokine |
| Q6EMK4    | VASN_HUMAN  | Vasorin (Protein slit-like 2)                                                                                                                              | Both     |

**Table S5.** List of proteins classified into the category of *Structural/Adhesion/Junctional* proteins based on GO annotations

| Accession | Entry name  | Description                                                                                                                                         | Sample   |
|-----------|-------------|-----------------------------------------------------------------------------------------------------------------------------------------------------|----------|
| P60708    | ACTB_HORSE  | Actin, cytoplasmic 1 (Beta-actin) [Cleaved into: Actin, cytoplasmic 1, N-terminally processed]                                                      | Both     |
| P63258    | ACTG_BOVIN  | Actin, cytoplasmic 2 (Gamma-actin) [Cleaved into: Actin, cytoplasmic 2, N-terminally processed]                                                     | Both     |
| Q9BYX7    | ACTBM_HUMAN | Putative beta-actin-like protein 3 (Kappa-actin) (POTE ankyrin domain family member K)                                                              | Control  |
| Q3B7N2    | ACTN1_BOVIN | Alpha-actinin-1 (Alpha-actinin cytoskeletal isoform) (F-actin cross-linking protein) (Non-muscle alpha-actinin-1)                                   | Cytokine |
| O43707    | ACTN4_HUMAN | Alpha-actinin-4 (Non-muscle alpha-actinin 4)                                                                                                        | Cytokine |
| Q10741    | ADA10_BOVIN | Disintegrin and metalloproteinase domain-containing protein 10 (ADAM 10) (EC 3.4.24.81) (Mammalian disintegrin-metalloprotease) (CD antigen CD156c) | Both     |
| P78536    | ADA17_HUMAN | Disintegrin and metalloproteinase domain-containing protein 17 (ADAM 17) (EC 3.4.24.86) (TNF-alpha convertase) (CD antigen CD156b)                  | Both     |
| P04075    | ALDOA_HUMAN | Fructose-bisphosphate aldolase A (EC 4.1.2.13) (Lung cancer antigen NY-LU-1) (Muscle-type aldolase)                                                 | Cytokine |
| Q9CZ52    | ANTR1_MOUSE | Anthrax toxin receptor 1 (Tumor endothelial marker 8)                                                                                               | Both     |
| Q8HZM6    | ANXA1_HORSE | Annexin A1 (Annexin I) (Annexin-1) (Calpactin II) (Calpactin-2) (Lipocortin I)                                                                      | Both     |
| P84080    | ARF1_BOVIN  | ADP-ribosylation factor 1                                                                                                                           | Control  |
| P62330    | ARF6_HUMAN  | ADP-ribosylation factor 6                                                                                                                           | Control  |
| P18075    | BMP7_HUMAN  | Bone morphogenetic protein 7 (BMP-7) (Osteogenic protein 1) (OP-1) (Eptotermin alfa)                                                                | Cytokine |
| P55287    | CAD11_HUMAN | Cadherin-11 (OSF-4) (Osteoblast cadherin) (OB-cadherin)                                                                                             | Both     |
| Q3B7N0    | CAD13_BOVIN | Cadherin-13                                                                                                                                         | Both     |
| Q9BY67    | CADM1_HUMAN | Cell adhesion molecule 1 (Immunoglobulin superfamily member 4) (Nectin-like protein 2)                                                              | Both     |
| P28491    | CALR_PIG    | Calreticulin (CRP55) (Calregulin) (Endoplasmic reticulum resident protein 60) (ERp60) (HACBP)                                                       | Both     |
| P17655    | CAN2_HUMAN  | Calpain-2 catalytic subunit (EC 3.4.22.53) (Calcium-activated neutral proteinase 2) (CANP 2) (Calpain M-type)                                       | Control  |
| P40124    | CAP1_MOUSE  | Adenylyl cyclase-associated protein 1 (CAP 1)                                                                                                       | Control  |
| Q3V3V9    | CARL2_MOUSE | Capping protein, Arp2/3 and myosin-I linker protein 2 (Capping protein regulator and myosin 1 linker 2)                                             | Control  |
| Q9BH13    | CD166_BOVIN | CD166 antigen (Activated leukocyte cell adhesion molecule) (CD antigen CD166)                                                                       | Both     |
| Q05078    | CD44_HORSE  | CD44 antigen (Extracellular matrix receptor III) (GP90 lymphocyte homing/adhesion receptor) (Hyaluronate receptor)                                  | Both     |
| Q9N0K1    | CD47_BOVIN  | Leukocyte surface antigen CD47 (Integrin-associated protein) (IAP) (CD antigen CD47)                                                                | Both     |
| P14209    | CD99_HUMAN  | CD99 antigen (12E7) (E2 antigen) (Protein MIC2) (T-cell surface glycoprotein E2) (CD antigen CD99)                                                  | Control  |
| Q2KJ93    | CDC42_BOVIN | Cell division control protein 42 homolog                                                                                                            | Control  |
| Q15517    | CDSN_HUMAN  | Corneodesmosin (S protein)                                                                                                                          | Control  |
| Q14008    | CKAP5_HUMAN | Cytoskeleton-associated protein 5 (Colonic and hepatic tumor overexpressed gene protein) (Ch-TOG)                                                   | Cytokine |
| Q8K4Q8    | COL12_MOUSE | Collectin-12 (Collectin placenta protein 1) (CL-P1) (Scavenger receptor with C-type lectin)                                                         | Cytokine |
| Q7L576    | CYFP1_HUMAN | Cytoplasmic FMR1-interacting protein 1 (Specifically Rac1-associated protein 1) (Sra-1) (p140sra-1)                                                 | Control  |
| Q96F07    | CYFP2_HUMAN | Cytoplasmic FMR1-interacting protein 2 (p53-inducible protein 121)                                                                                  | Control  |
| P01040    | CYTA_HUMAN  | Cystatin-A (Cystatin-AS) (Stefin-A) [Cleaved into: Cystatin-A, N-terminally processed]                                                              | Both     |
| P21291    | CSRP1_HUMAN | Cysteine and glycine-rich protein 1 (Cysteine-rich protein 1) (CRP) (CRP1) (Epididymis luminal protein 141) (HEL-141)                               | Both     |
| Q16832    | DDR2_HUMAN  | Discoidin domain-containing receptor 2 (Discoidin domain receptor 2) (EC 2.7.10.1) (CD167 antigen-like family member B) (CD antigen CD167b)         | Both     |
| P15924    | DESP_HUMAN  | Desmoplakin (DP) (250/210 kDa paraneoplastic pemphigus antigen)                                                                                     | Both     |
| Q12959    | DLG1_HUMAN  | Disks large homolog 1 (Synapse-associated protein 97) (SAP-97) (SAP97) (hDlg)                                                                       | Control  |



**Table S5.** (continued)

| Accession | Entry name  | Description                                                                                                                                                   | Sample   |
|-----------|-------------|---------------------------------------------------------------------------------------------------------------------------------------------------------------|----------|
| Q15700    | DLG2_HUMAN  | Disks large homolog 2 (Channel-associated protein of synapse-110) (Chapsyn-110) (Postsynaptic density protein PSD-93)                                         | Control  |
| Q14574    | DSC3_HUMAN  | Desmocollin-3 (Cadherin family member 3) (Desmocollin-4) (HT-CP)                                                                                              | Control  |
| Q02413    | DSG1_HUMAN  | Desmoglein-1 (Cadherin family member 4) (Desmosomal glycoprotein 1) (DG1) (DGI) (Pemphigus foliaceus antigen)                                                 | Both     |
| O43854    | EDIL3_HUMAN | EGF-like repeat and discoidin I-like domain-containing protein 3 (Developmentally-regulated endothelial cell locus 1 protein) (Integrin-binding protein DEL1) | Both     |
| P98172    | EFNB1_HUMAN | Ephrin-B1 (EFL-3) (ELK ligand) (ELK-L) (EPH-related receptor tyrosine kinase ligand 2) (LERK-2)                                                               | Both     |
| P00533    | EGFR_HUMAN  | Epidermal growth factor receptor (EC 2.7.10.1) (Proto-oncogene c-ErbB-1) (Receptor tyrosine-protein kinase erbB-1)                                            | Both     |
| P37176    | EGLN_PIG    | Endoglin (CD antigen CD105)                                                                                                                                   | Control  |
| Q9NZN4    | EHD2_HUMAN  | EH domain-containing protein 2 (PAST homolog 2)                                                                                                               | Control  |
| P14625    | ENPL_HUMAN  | Endoplasmic (94 kDa glucose-regulated protein) (GRP-94) (Heat shock protein 90 kDa beta member 1) (Tumor rejection antigen 1) (gp96 homolog)                  | Both     |
| P29317    | EPHA2_HUMAN | Ephrin type-A receptor 2 (EC 2.7.10.1) (Epithelial cell kinase) (Tyrosine-protein kinase receptor ECK)                                                        | Both     |
| P54764    | EPHA4_HUMAN | Ephrin type-A receptor 4 (EC 2.7.10.1) (EPH-like kinase 8) (EK8) (hEK8) (Tyrosine-protein kinase TYRO1) (Tyrosine-protein kinase receptor SEK)                | Both     |
| P54756    | EPHA5_HUMAN | Ephrin type-A receptor 5 (EC 2.7.10.1) (Brain-specific kinase) (EPH homology kinase 1) (EHK-1) (EPH-like kinase 7) (EK7) (hEK7)                               | Control  |
| O09127    | EPHA8_MOUSE | Ephrin type-A receptor 8 (EC 2.7.10.1) (EPH- and ELK-related kinase) (Tyrosine-protein kinase receptor EEK)                                                   | Control  |
| P54761    | EPHB4_MOUSE | Ephrin type-B receptor 4 (EC 2.7.10.1) (Developmental kinase 2) (mDK-2) (Hepatoma transmembrane kinase) (Tyrosine kinase MYK-1)                               | Both     |
| F1LYQ8    | FARP1_RAT   | FERM, ARHGEF and pleckstrin domain-containing protein 1 (FERM, RhoGEF and pleckstrin domain-containing protein 1)                                             | Both     |
| Q96AC1    | FERM2_HUMAN | Fermitin family homolog 2 (Kindlin-2) (Mitogen-inducible gene 2 protein) (Pleckstrin homology domain-containing family C member 1)                            | Control  |
| Q61851    | FGFR3_MOUSE | Fibroblast growth factor receptor 3 (FGFR-3) (EC 2.7.10.1) (Heparin-binding growth factor receptor) (CD antigen CD333)                                        | Control  |
| Q5D862    | FILA2_HUMAN | Filaggrin-2 (FLG-2) (Intermediate filament-associated and psoriasis-susceptibility protein) (Ifapsoriasis)                                                    | Both     |
| P07589    | FINC_BOVIN  | Fibronectin (FN) [Cleaved into: Anastellin]                                                                                                                   | Both     |
| P21333    | FLNA_HUMAN  | Filamin-A (FLN-A) (Actin-binding protein 280) (ABP-280) (Alpha-filamin) (Endothelial actin-binding protein) (Filamin-1) (Non-muscle filamin)                  | Both     |
| O75369    | FLNB_HUMAN  | Filamin-B (FLN-B) (ABP-278) (ABP-280 homolog) (Actin-binding-like protein)                                                                                    | Cytokine |
| O43155    | FLRT2_HUMAN | Leucine-rich repeat transmembrane protein FLRT2 (Fibronectin-like domain-containing leucine-rich transmembrane protein 2)                                     | Both     |
| P14207    | FOLR2_HUMAN | Folate receptor beta (FR-beta) (Folate receptor 2) (Folate receptor, fetal/placental) (Placental folate-binding protein) (FBP)                                | Cytokine |
| Q9UP38    | FZD1_HUMAN  | Frizzled-1 (Fz-1) (hFz1) (FzE1)                                                                                                                               | Both     |
| O75084    | FZD7_HUMAN  | Frizzled-7 (Fz-7) (hFz7) (FzE3)                                                                                                                               | Both     |
| P32942    | ICAM3_HUMAN | Intercellular adhesion molecule 3 (ICAM-3) (CDw50) (ICAM-R) (CD antigen CD50)                                                                                 | Control  |
| P46940    | IQGA1_HUMAN | Ras GTPase-activating-like protein IQGAP1 (p195)                                                                                                              | Both     |
| O14498    | ISLR_HUMAN  | Immunoglobulin superfamily containing leucine-rich repeat protein                                                                                             | Control  |
| P56199    | ITA1_HUMAN  | Integrin alpha-1 (CD49 antigen-like family member A) (Laminin and collagen receptor) (VLA-1) (CD antigen CD49a)                                               | Both     |
| O75578    | ITA10_HUMAN | Integrin alpha-10                                                                                                                                             | Control  |
| Q9UKX5    | ITA11_HUMAN | Integrin alpha-11                                                                                                                                             | Both     |
| F1MMS9    | ITA3_BOVIN  | Integrin alpha-3 (CD49 antigen-like family member C) (Galactoprotein B3) (VLA-3 subunit alpha)                                                                | Both     |
| Q27977    | ITA5_BOVIN  | Integrin alpha-5 (Fibronectin receptor subunit alpha) (Integrin alpha-F) (VLA-5)                                                                              | Both     |
| P23229    | ITA6_HUMAN  | Integrin alpha-6 (CD49 antigen-like family member F) (VLA-6) (CD antigen CD49f)                                                                               | Both     |
| P43406    | ITAV_MOUSE  | Integrin alpha-V (Vitronectin receptor subunit alpha) (CD antigen CD51) [Cleaved into: Integrin alpha-V heavy chain; Integrin alpha-V light chain]            | Control  |
| P53712    | ITB1_BOVIN  | Integrin beta-1 (Fibronectin receptor subunit beta) (VLA-4 subunit beta) (CD antigen CD29)                                                                    | Both     |
| P32592    | ITB2_BOVIN  | Integrin beta-2 (Cell surface adhesion glycoproteins LFA-1/CR3/p150,95 subunit beta) (Complement receptor C3 subunit beta) (CD antigen CD18)                  | Cytokine |

**Table S5.** (continued)

| Accession | Entry name  | Description                                                                                                                                                     | Sample   |
|-----------|-------------|-----------------------------------------------------------------------------------------------------------------------------------------------------------------|----------|
| P80747    | ITB5_BOVIN  | Integrin beta-5                                                                                                                                                 | Both     |
| P26010    | ITB7_HUMAN  | Integrin beta-7 (Gut homing receptor beta subunit)                                                                                                              | Both     |
| Q96J84    | KIRR1_HUMAN | Kin of IRR-like protein 1 (Kin of irregular chiasm-like protein 1) (Nephrin-like protein 1)                                                                     | Cytokine |
| Q769I5    | MET_BOVIN   | Hepatocyte growth factor receptor (HGF receptor) (EC 2.7.10.1)                                                                                                  | Cytokine |
| Q95114    | MFGM_BOVIN  | Lactadherin (BP47) (Components 15/16) (MFGM) (MGP57/53) (Milk fat globule-EGF factor 8) (MFG-E8) (PAS-6/PAS-7 glycoprotein)                                     | Both     |
| O95297    | MPZL1_HUMAN | Myelin protein zero-like protein 1 (Protein zero-related)                                                                                                       | Both     |
| Q148M6    | MXRA8_BOVIN | Matrix remodeling-associated protein 8 (Limitrin)                                                                                                               | Control  |
| Q6VBQ5    | MYADM_RAT   | Myeloid-associated differentiation marker (Myeloid up-regulated protein)                                                                                        | Control  |
| P35579    | MYH9_HUMAN  | Myosin-9 (Cellular myosin heavy chain, type A) (Myosin heavy chain 9) (Myosin heavy chain, non-muscle IIa) (Non-muscle myosin heavy chain A)                    | Control  |
| Q9Y2A7    | NCKP1_HUMAN | Nck-associated protein 1 (NAP 1) (Membrane-associated protein HEM-2) (p125Nap1)                                                                                 | Control  |
| Q15223    | NECT1_HUMAN | Nectin-1 (Herpes virus entry mediator C) (Nectin cell adhesion molecule 1) (Poliovirus receptor-related protein 1) (CD antigen CD111)                           | Both     |
| Q9NQS3    | NECT3_HUMAN | Nectin-3 (CDw113) (Nectin cell adhesion molecule 3) (CD antigen CD113)                                                                                          | Both     |
| Q8NFX4    | NLGN2_HUMAN | Neuroigin-2                                                                                                                                                     | Control  |
| Q04721    | NOTC2_HUMAN | Neurogenic locus notch homolog protein 2 (Notch 2) (hN2)                                                                                                        | Both     |
| Q9Y639    | NPTN_HUMAN  | Neuroplastin (Stromal cell-derived receptor 1) (SDR-1)                                                                                                          | Both     |
| O14786    | NRP1_HUMAN  | Neuropilin-1 (Vascular endothelial cell growth factor 165 receptor) (CD antigen CD304)                                                                          | Cytokine |
| O60462    | NRP2_HUMAN  | Neuropilin-2 (Vascular endothelial cell growth factor 165 receptor 2)                                                                                           | Both     |
| O15018    | PDZD2_HUMAN | PDZ domain-containing protein 2 (Activated in prostate cancer protein) (PDZ domain-containing protein 3)                                                        | Cytokine |
| P16234    | PGFRA_HUMAN | Platelet-derived growth factor receptor alpha (PDGF-R-alpha) (PDGFR-alpha) (EC 2.7.10.1) (CD140a antigen)(Platelet-derived growth factor receptor 2)            | Control  |
| P09619    | PGFRB_HUMAN | Platelet-derived growth factor receptor beta (PDGF-R-beta) (PDGFR-beta) (EC 2.7.10.1) (Platelet-derived growth factor receptor 1) (PDGFR-1) (CD antigen CD140b) | Both     |
| Q92508    | PIEZ1_HUMAN | Piezo-type mechanosensitive ion channel component 1 (Membrane protein induced by beta-amyloid treatment) (Mib) (Protein FAM38A)                                 | Both     |
| Q28161    | PKP1_BOVIN  | Plakophilin-1 (Band-6 protein) (B6P)                                                                                                                            | Cytokine |
| Q8SPJ1    | PLAK_BOVIN  | Junction plakoglobin (Desmoplakin III) (Desmoplakin-3)                                                                                                          | Both     |
| O14495    | PLPP3_HUMAN | Phospholipid phosphatase 3 (EC 3.1.3.4) (Lipid phosphate phosphohydrolase 3) (PAP2-beta) (Phosphatidate phosphohydrolase type 2b)                               | Both     |
| Q9UIW2    | PLXA1_HUMAN | Plexin-A1 (Semaphorin receptor NOV)                                                                                                                             | Both     |
| O43157    | PLXB1_HUMAN | Plexin-B1 (Semaphorin receptor SEP)                                                                                                                             | Cytokine |
| O15031    | PLXB2_HUMAN | Plexin-B2 (MM1)                                                                                                                                                 | Both     |
| P07737    | PROF1_HUMAN | Profilin-1 (Epididymis tissue protein Li 184a) (Profilin I)                                                                                                     | Control  |
| Q13308    | PTK7_HUMAN  | Inactive tyrosine-protein kinase 7 (Colon carcinoma kinase 4) (CCK-4) (Protein-tyrosine kinase 7) (Tyrosine-protein kinase-like 7)                              | Both     |
| Q12913    | PTPRJ_HUMAN | Receptor-type tyrosine-protein phosphatase eta (Protein-tyrosine phosphatase eta) (R-PTP-eta) (EC 3.1.3.48) (CD antigen CD148)                                  | Control  |
| P28828    | PTPRM_MOUSE | Receptor-type tyrosine-protein phosphatase mu (Protein-tyrosine phosphatase mu) (R-PTP-mu) (EC 3.1.3.48)                                                        | Control  |
| P62820    | RAB1A_HUMAN | Ras-related protein Rab-1A (YPT1-related protein)                                                                                                               | Both     |
| P62998    | RAC1_BOVIN  | Ras-related C3 botulinum toxin substrate 1 (p21-Rac1)                                                                                                           | Control  |
| Q9Y6N7    | ROBO1_HUMAN | Roundabout homolog 1 (Deleted in U twenty twenty) (H-Robo-1)                                                                                                    | Both     |
| P06702    | S10A9_HUMAN | Protein S100-A9 (Calgranulin-B) (Calprotectin L1H subunit) (Leukocyte L1 complex heavy chain) (Migration inhibitory factor-related protein 14)                  | Cytokine |
| P60902    | S10AA_BOVIN | Protein S100-A10 (Calpactin I light chain) (Calpactin-1 light chain) (Cellular ligand of annexin II) (S100 calcium-binding protein A10)                         | Control  |
| Q58EX2    | SDK2_HUMAN  | Protein sidekick-2                                                                                                                                              | Both     |

**Table S5.** (continued)

| Accession | Entry name  | Description                                                                                                                               | Sample   |
|-----------|-------------|-------------------------------------------------------------------------------------------------------------------------------------------|----------|
| O00241    | SIRB1_HUMAN | Signal-regulatory protein beta-1 (SIRP-beta-1) (CD172 antigen-like family member B) (CD antigen CD172b)                                   | Both     |
| Q71U36    | TBA1A_HUMAN | Tubulin alpha-1A chain (Alpha-tubulin 3) (Tubulin B-alpha-1) (Tubulin alpha-3 chain) [Cleaved into: Detyrosinated tubulin alpha-1A chain] | Cytokine |
| Q13885    | TBB2A_HUMAN | Tubulin beta-2A chain (Tubulin beta class IIa)                                                                                            | Control  |
| Q9P273    | TEN3_HUMAN  | Teneurin-3 (Ten-3) (Protein Odd Oz/ten-m homolog 3) (Tenascin-M3) (Ten-m3) (Teneurin transmembrane protein 3)                             | Both     |
| P04216    | THY1_HUMAN  | Thy-1 membrane glycoprotein (CDw90) (Thy-1 antigen) (CD antigen CD90)                                                                     | Control  |
| Q9Y490    | TLN1_HUMAN  | Talin-1                                                                                                                                   | Both     |
| Q13641    | TPBG_HUMAN  | Trophoblast glycoprotein (5T4 oncofetal antigen) (5T4 oncofetal trophoblast glycoprotein) (Wnt-activated inhibitory factor 1) (WAIF1)     | Control  |
| Q28178    | TSP1_BOVIN  | Thrombospondin-1 (Glycoprotein G)                                                                                                         | Both     |
| P30530    | UFO_HUMAN   | Tyrosine-protein kinase receptor UFO (EC 2.7.10.1) (AXL oncogene)                                                                         | Both     |
| Q28260    | VCAM1_CANLF | Vascular cell adhesion protein 1 (V-CAM 1) (VCAM-1) (CD antigen CD106)                                                                    | Both     |
| P04004    | VTNC_HUMAN  | Vitronectin (VN) (S-protein) (Serum-spreading factor) (V75)                                                                               | Control  |

**Table S6.** List of proteins classified into the category of *Extracellular matrix* proteins based on GO annotations

| Accession | Entry name  | Description                                                                                                                                                 | Sample   |
|-----------|-------------|-------------------------------------------------------------------------------------------------------------------------------------------------------------|----------|
| Q61072    | ADAM9_MOUSE | Disintegrin and metalloproteinase domain-containing protein 9 (ADAM 9) (EC 3.4.24.-) (Meltrin-gamma) (Metalloprotease/disintegrin/cysteine-rich protein 9)  | Both     |
| P02461    | CO3A1_HUMAN | Collagen alpha-1(III) chain                                                                                                                                 | Both     |
| Q3U962    | CO5A2_MOUSE | Collagen alpha-2(V) chain                                                                                                                                   | Cytokine |
| P12109    | CO6A1_HUMAN | Collagen alpha-1(VI) chain                                                                                                                                  | Both     |
| P12110    | CO6A2_HUMAN | Collagen alpha-2(VI) chain                                                                                                                                  | Both     |
| P12111    | CO6A3_HUMAN | Collagen alpha-3(VI) chain                                                                                                                                  | Control  |
| A2AX52    | CO6A4_MOUSE | Collagen alpha-4(VI) chain                                                                                                                                  | Control  |
| Q99715    | COCA1_HUMAN | Collagen alpha-1(XII) chain                                                                                                                                 | Cytokine |
| Q16832    | DDR2_HUMAN  | Discoidin domain-containing receptor 2 (Discoidin domain receptor 2) (EC 2.7.10.1) (CD167 antigen-like family member B) (CD antigen CD167b)                 | Both     |
| P17813    | EGLN_HUMAN  | Endoglin (CD antigen CD105)                                                                                                                                 | Both     |
| P11276    | FINC_MOUSE  | Fibronectin (FN) [Cleaved into: Anastellin]                                                                                                                 | Control  |
| P32942    | ICAM3_HUMAN | Intercellular adhesion molecule 3 (ICAM-3) (CDw50) (ICAM-R) (CD antigen CD50)                                                                               | Control  |
| P11047    | LAMC1_HUMAN | Laminin subunit gamma-1 (Laminin B2 chain)                                                                                                                  | Both     |
| Q07954    | LRP1_HUMAN  | Prolow-density lipoprotein receptor-related protein 1 (LRP-1) (Alpha-2-macroglobulin receptor) (A2MR) (Apolipoprotein E receptor) (APOER) (CD antigen CD91) | Both     |
| Q9GLE4    | MMP14_BOVIN | Matrix metalloproteinase-14 (MMP-14) (EC 3.4.24.80) (Membrane-type matrix metalloproteinase 1) (MT-MMP 1)                                                   | Both     |
| Q92626    | PXDN_HUMAN  | Peroxidasin homolog (EC 1.11.1.7) (Melanoma-associated antigen MG50) (Vascular peroxidase 1) (p53-responsive gene 2 protein)                                | Cytokine |
| O95980    | RECK_HUMAN  | Reversion-inducing cysteine-rich protein with Kazal motifs (hRECK) (Suppressor of tumorigenicity 15 protein)                                                | Both     |
| P04216    | THY1_HUMAN  | Thy-1 membrane glycoprotein (CDw90) (Thy-1 antigen) (CD antigen CD90)                                                                                       | Control  |
| Q28178    | TSP1_BOVIN  | Thrombospondin-1 (Glycoprotein G)                                                                                                                           | Both     |
| P04004    | VTNC_HUMAN  | Vitronectin (VN) (S-protein) (Serum-spreading factor) (V75) [Cleaved into: Vitronectin V65 subunit; Vitronectin V10 subunit; Somatomedin-B]                 | Control  |
