# Supplementary material for: Alterations in the chondrocyte surfaceome in response to pro-inflammatory cytokines
Source: PubMed Central journal article supplement (PMC7318434; doi:10.1186/s12860-020-00288-9), 2020-06-26
Supplement: 12860_2020_288_MOESM7_ESM.pdf [file 12860_2020_288_MOESM7_ESM.pdf]

Supplementary Materials for

**Alterations in the chondrocyte surfaceome  
in response to pro-inflammatory cytokines**

Bernadette Jeremiase, Csaba Matta\*, Christopher R. Fellows, David J. Boocock, Julia R. Smith, Susan Liddell, Floris Lafeber, Willem E. van Spil, Ali Mobasher

\*Corresponding author. E-mail: [matta.csaba@med.unideb.hu](mailto:matta.csaba@med.unideb.hu) (C.M.)

**This PDF file (Additional File #7) includes:**

**Figures S3–S12.** Uncropped western blot membrane images

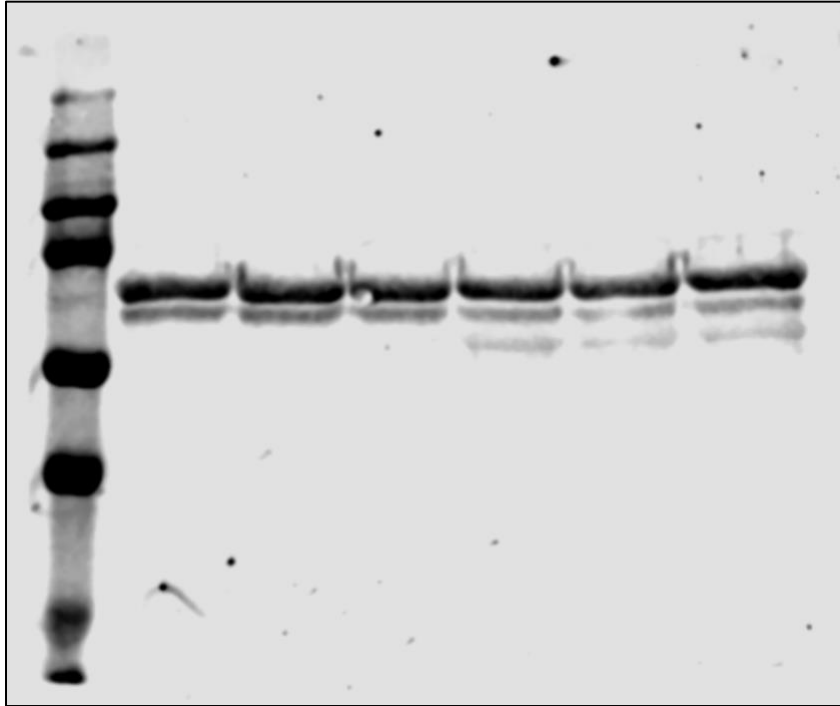

**Figure S3.** Uncropped western blot membrane image for the cropped bands shown in **Figure 2A**.

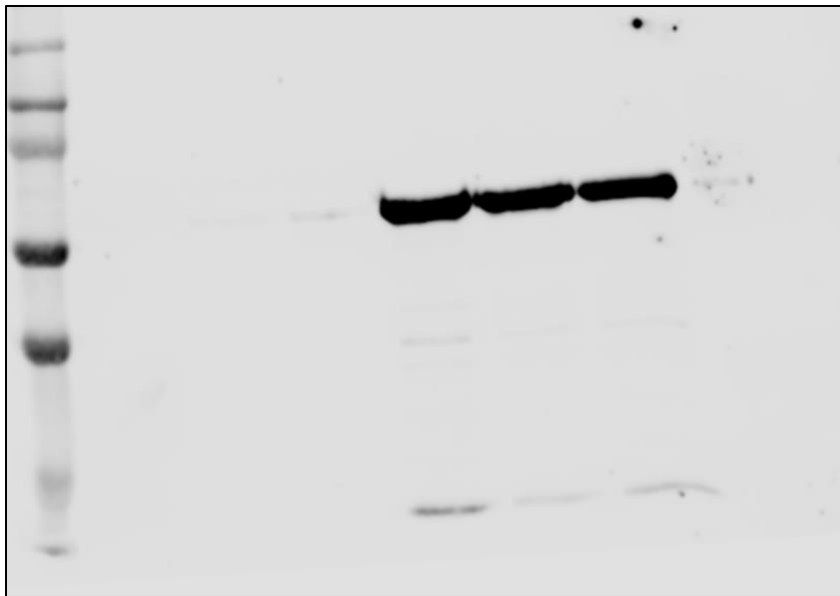

**Figure S4.** Uncropped western blot membrane image for the cropped bands shown in **Figure 2B**.

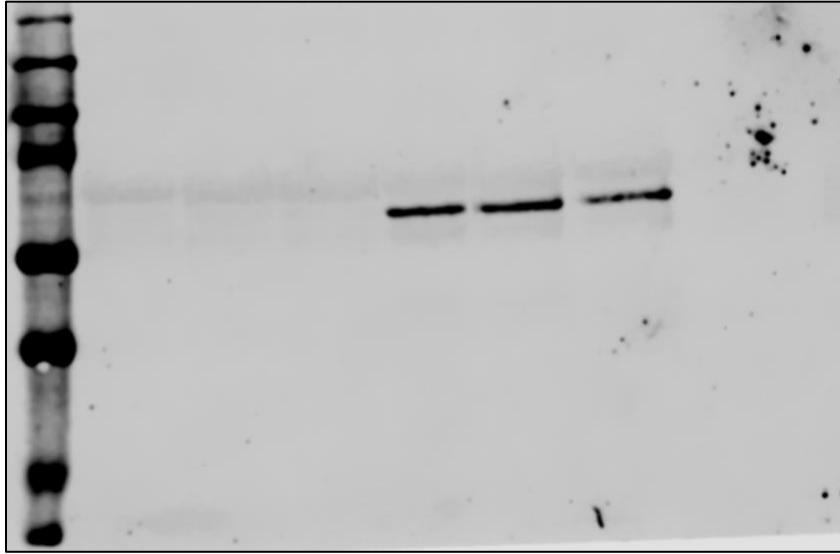

**Figure S5.** Uncropped western blot membrane image for the cropped bands shown in **Figure 2C**.

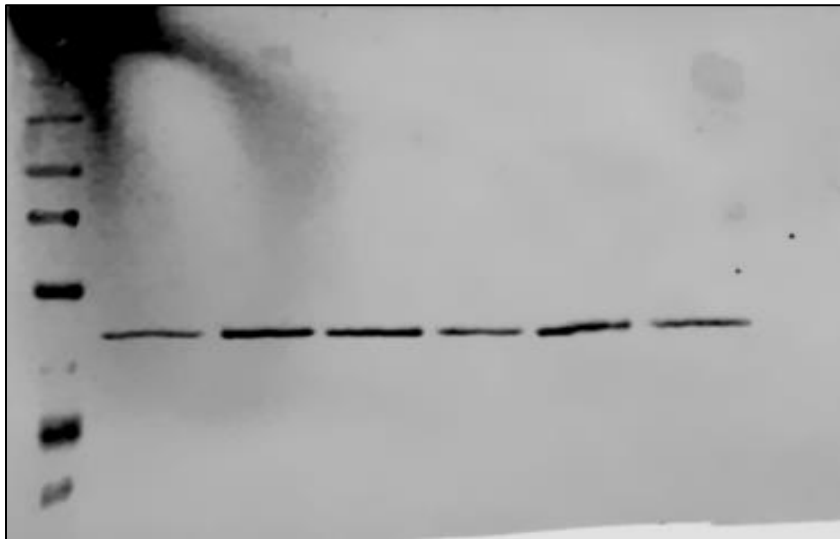

**Figure S6.** Uncropped western blot membrane image for the cropped bands shown in **Figure 2D**.

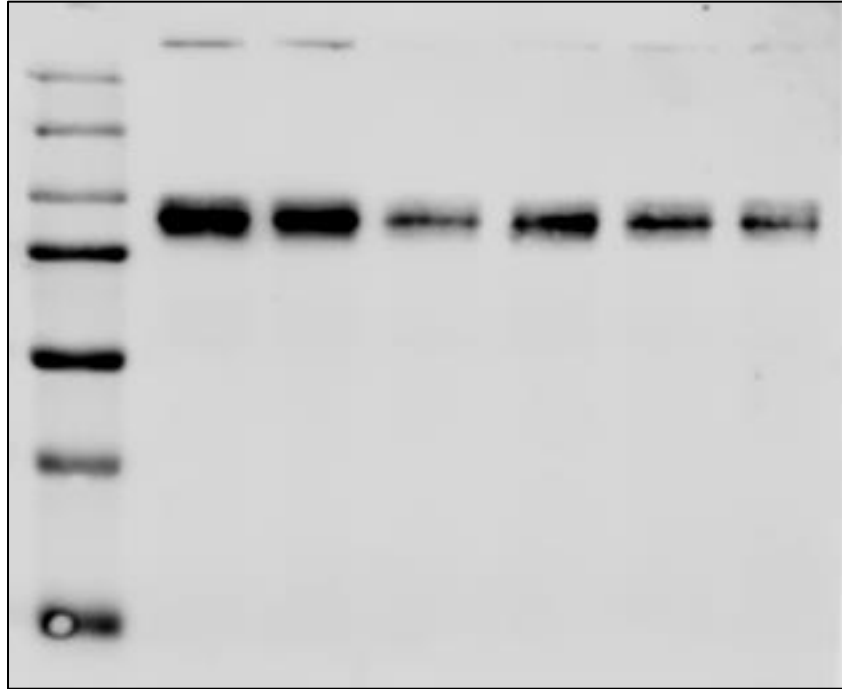

**Figure S7.** Uncropped western blot membrane image for the cropped bands shown in **Figure 5A**.

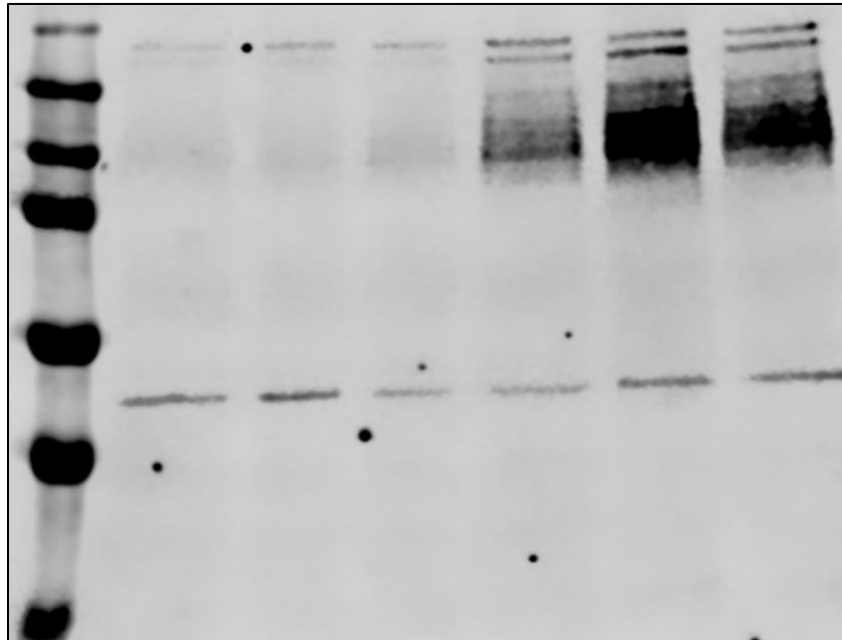

**Figure S8.** Uncropped western blot membrane image for the cropped bands shown in **Figure 5B**.

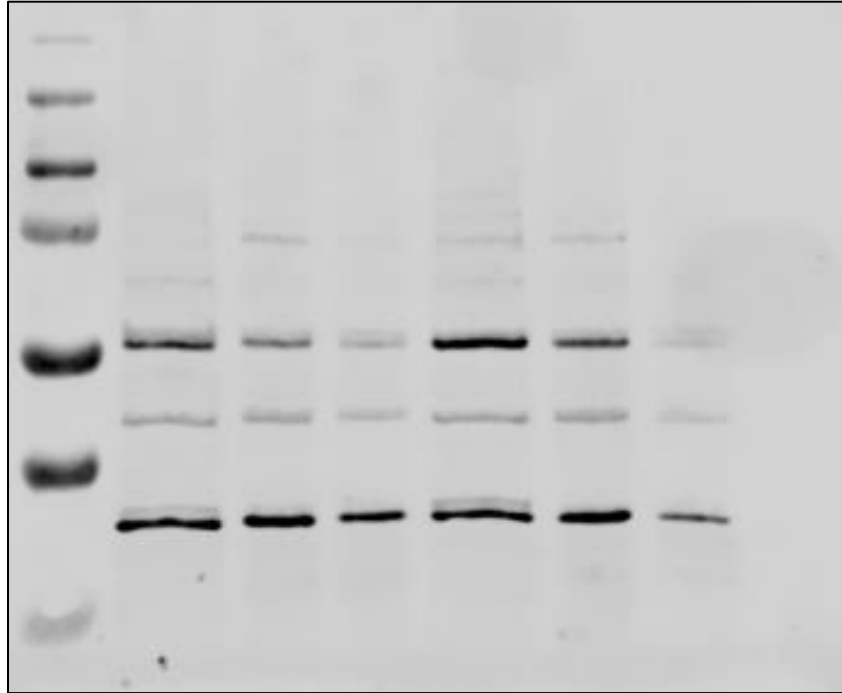

**Figure S9.** Uncropped western blot membrane image for the cropped bands shown in **Figure 5C** and **6A**.

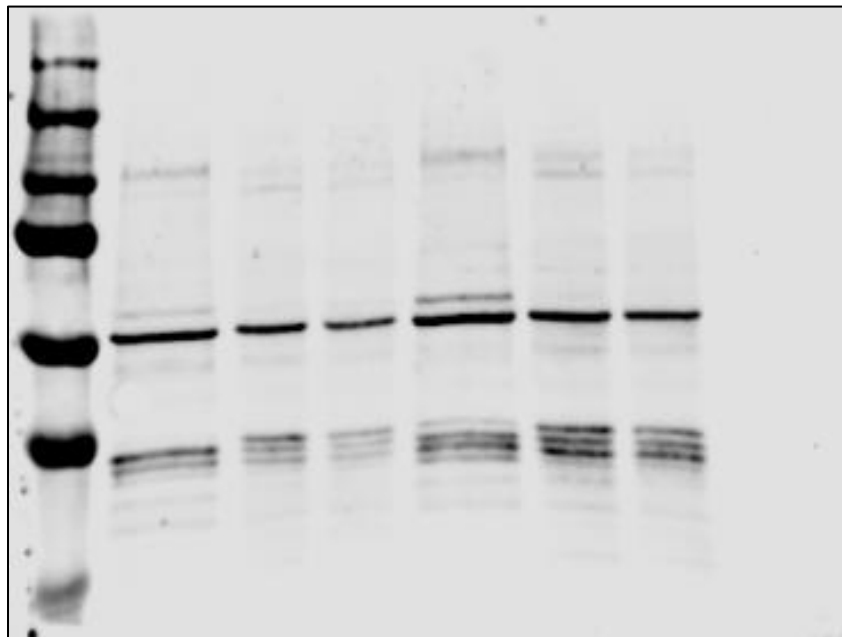

**Figure S10.** Uncropped western blot membrane image for the cropped bands shown in **Figure 5D** and **6B**.

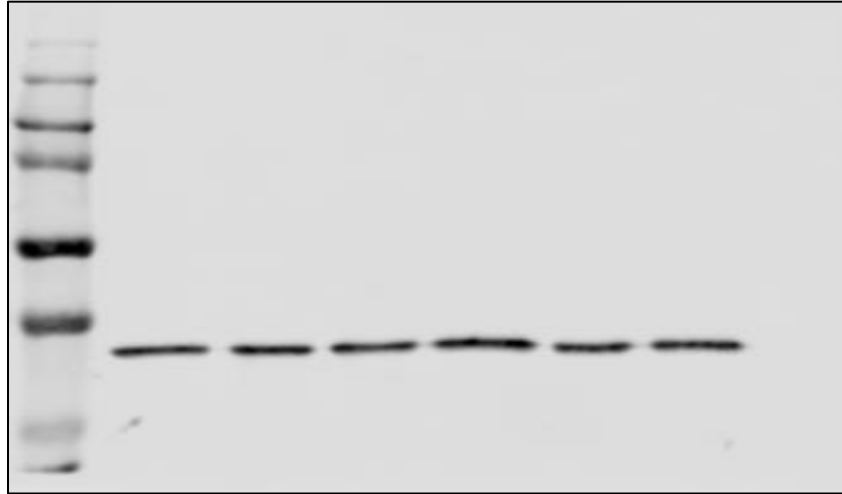

**Figure S11.** Uncropped western blot membrane image for the cropped bands shown in **Figure 5E**.

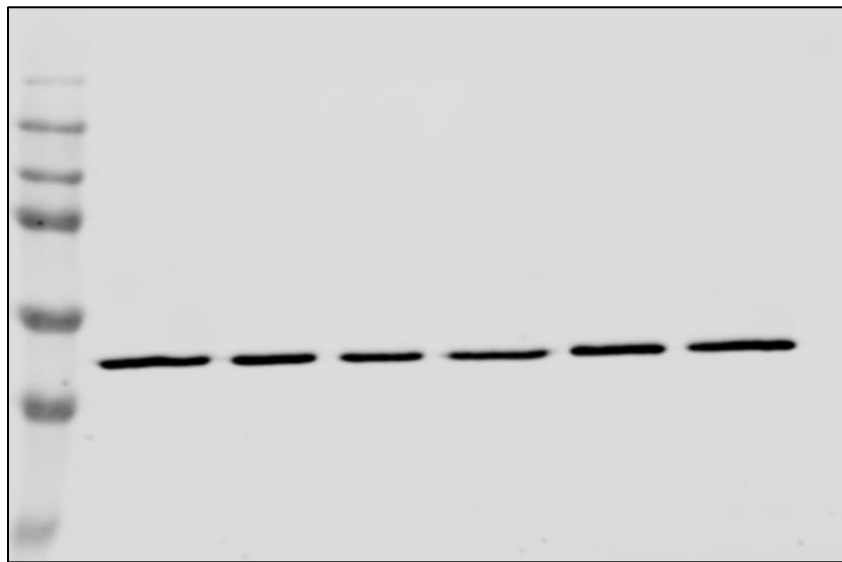

**Figure S12.** Uncropped western blot membrane image for the cropped bands shown in **Figure 5F**.
